# Supplementary material for: Highly stereocontrolled synthesis of trans-enediynes via carbocupration of fluoroalkylated diynes
Source: publisher site journal article supplement (doi:10.3762/bjoc.8.249), 2012-12-19

## **Supporting Information**

for

### **Highly stereocontrolled synthesis of *trans*-enediynes via carbocupration of fluoroalkylated diynes**

Tsutomu Konno\*, Misato Kishi, and Takashi Ishihara

Address: Department of Chemistry and Materials Technology, Kyoto Institute of Technology,

Matsugasaki, Sakyo-ku, Kyoto 606-0962, Japan

Email: Tsutomu Konno\* – konno@chem.kit.ac.jp

\* Corresponding author

**Experimental, characterization details, and NMR spectra of synthesized compounds, 4e, 13a–e, and 14a–c**

## General methods

Infrared spectra (IR) were determined in a liquid film on a NaCl plate or KBr disk method with a JASCO FT/IR-4100 type A spectrometer.  $^1\text{H}$  and  $^{13}\text{C}$  NMR spectra were measured with a JEOL JNM-AL 400 NMR spectrometer in a chloroform-*d* ( $\text{CDCl}_3$ ) solution with tetramethylsilane ( $\text{Me}_4\text{Si}$ ) as an internal reference. A JEOL JNM-EX90A (84.21 MHz) FT-NMR spectrometer and a JEOL JNM-AL 400 NMR spectrometer were used for determining the yield of the products with hexafluorobenzene ( $\text{C}_6\text{F}_6$ ).  $^{19}\text{F}$  NMR (376.05 MHz) spectra were measured with a JEOL JNM-AL 400 NMR spectrometer in a chloroform-*d* ( $\text{CDCl}_3$ ) solution with trichlorofluoromethane ( $\text{CFCl}_3$ ) as an internal standard. High-resolution mass spectra (HRMS) were taken on a JEOL JMS-700MS spectrometer by electron impact (EI), chemical ionization (CI), and fast atom bombardment (FAB) methods.

All reactions were routinely monitored by  $^{19}\text{F}$  NMR spectroscopy or TLC and carried out under an atmosphere of argon.

## Materials

DMF,  $\text{Et}_3\text{N}$  and HMDS were freshly distilled from calcium hydride ( $\text{CaH}_2$ ). All chemicals were of reagent grade and, if necessary, were purified in the usual manner prior to use. Thin-layer chromatography (TLC) was done with Merck silica gel 60 F<sub>254</sub> plates, and column chromatography was carried out using Wako gel C-200 as adsorbent.

## Synthesis of 6-benzyloxy-1,1,1-trifluoro-6-methyl-2,4-heptadiyne (4e)

To a solution of HMDS (1.6 mL, 7.5 mmol) in THF (50 mL) was added 4.7 mL (7.5 mmol) of *n*-BuLi (1.6 M hexane solution) at  $-78\text{ }^\circ\text{C}$  and the whole was stirred for 15 min. To this solution was added 6-benzyloxy-1,1,1,2-tetrafluoro-6-methyl-2-hepten-4-yne **3e** (1.43 g, 5.0 mmol) at  $-78\text{ }^\circ\text{C}$  and the whole solution was stirred for 1 h. The reaction mixture was quenched with sat.  $\text{NH}_4\text{Cl}$  aq. and the whole was extracted with  $\text{Et}_2\text{O}$  three times. The combined organic layers were dried over anhydrous  $\text{Na}_2\text{SO}_4$ , then filtered. The filtrate was evaporated to give the crude materials, which was purified by silica gel column chromatography, affording the 6-benzyloxy-1,1,1-trifluoro-6-methyl-2,4-heptadiyne **4e** as yellow liquid (1.26 g, 4.74 mmol, 95% yield).

$^1\text{H}$  NMR ( $\text{CDCl}_3$ )  $\delta$  = 1.59 (s, 6H), 4.62 (s, 2H), 7.28–7.36 (m, 5H);  $^{13}\text{C}$  NMR ( $\text{CDCl}_3$ )  $\delta$  = 2.07, 28.16, 53.34, 64.04 (q,  $J$  = 53.71 Hz), 66.06 (q,  $J$  = 3.31 Hz), 66.63, 67.18, 70.70 (q,  $J$  = 6.63 Hz), 70.92, 87.24, 113.79 (q,  $J$  = 257.36 Hz), 127.67, 127.71, 128.41, 138.034;  $^{19}\text{F}$  NMR ( $\text{CDCl}_3$ )  $\delta$  =  $-50.38$  (s, 3F); IR (neat) : 3033, 2989, 2868, 2266, 2171, 1467, 1383, 1321, 1149, 1054  $\text{cm}^{-1}$ ; HRMS (EI) calcd for  $\text{C}_{15}\text{H}_{13}\text{F}_3\text{O}$  ( $\text{M}^+$ ) 266.0918, found 266.0915.

### Carbocupration of 6-benzyloxy-1,1,1-trifluoro-6-methyl-2,4-heptadiyne (4e)

To a solution of copper cyanide (54 mg, 0.6 mmol) in THF (2.0 mL) was added 0.75 mL (1.2 mmol) of *n*-BuLi (1.6 M hexane solution) at -45 °C and the whole was stirred for 10 min, then allowed to warm to -20 °C and stirred for 30 min. To this solution was added dropwise a solution of 6-benzyloxy-1,1,1-trifluoro-6-methyl-2,4-heptadiyne **4e** (133 mg, 0.5 mmol) in THF (0.5 mL). The reaction was stirred for 1 h at -45 °C, and was then quenched with NH<sub>3</sub> aq./MeOH (1 mL/5 mL) and extracted with Et<sub>2</sub>O three times. The combined organic layers were dried over anhydrous Na<sub>2</sub>SO<sub>4</sub> and concentrated *in vacuo*. The residue was chromatographed on silica gel to afford (*Z*)-6-benzyloxy-3-*n*-butyl-1,1,1-trifluoro-6-methyl-2-hepten-4-yne **5** (0.098 g, 0.30 mmol, 61% yield).

<sup>1</sup>H NMR (CDCl<sub>3</sub>) δ = 0.80–2.15 (m, 15H), 4.54 (s, 2H), 5.67 (q, *J* = 7.59 Hz, 1H), 7.17–7.28 (m, 5H); <sup>13</sup>C NMR (CDCl<sub>3</sub>) δ = 13.78, 21.84, 22.64, 28.53 (q, *J* = 1.61 Hz), 29.75, 30.34, 37.48, 66.78 (t, *J* = 2.06 Hz), 71.04, 79.67 (q, *J* = 1.66 Hz), 101.68 (q, *J* = 1.71 Hz), 122.07 (qd, *J* = 33.89, 2.46 Hz), 122.36 (q, *J* = 270.01 Hz), 127.42, 127.79, 134.21 (q, *J* = 5.79 Hz), 138.82; <sup>19</sup>F NMR (CDCl<sub>3</sub>) δ = -60.37 (d, *J* = 7.52 Hz, 3F); IR (neat) : 3066, 2934, 2864, 2224, 1642, 1497, 1455, 1379, 1123, 1056 cm<sup>-1</sup>; HRMS (FAB) calcd for C<sub>19</sub>H<sub>23</sub>F<sub>3</sub>NaO (M+Na) 347.1599, found 347.1601.

### Preparation of (*E*)-6-benzyloxy-3-*n*-butyl-1,1,1-trifluoro-2-iodo-6-methyl-2-hepten-4-yne (13a)

To a solution of copper cyanide (54 mg, 0.6 mmol) in THF (2.0 mL) was added 0.75 mL (1.2 mmol) of *n*-BuLi (1.6 M hexane solution) at -45 °C and the whole was stirred for 10 min, then allowed to warm to -20 °C and stirred for 30 min. To this solution was added dropwise a solution of 6-benzyloxy-1,1,1-trifluoro-6-methyl-2,4-heptadiyne **4e** (133 mg, 0.5 mmol) in THF (0.5 mL). The reaction was stirred for 1 h at -45 °C. After stirring at that temperature for 1 h, iodine (609 mg, 2.4 mmol) was added to the reaction mixture. After 1 h, the reaction was quenched with NH<sub>3</sub> aq./MeOH (1 mL/5 mL), extracted with Et<sub>2</sub>O three times. The combined organic layers were dried over anhydrous Na<sub>2</sub>SO<sub>4</sub> and concentrated *in vacuo*. The residue was chromatographed on silica gel to afford (*E*)-6-benzyloxy-3-*n*-butyl-1,1,1-trifluoro-2-iodo-6-methyl-2-hepten-4-yne **13a** (0.121 g, 0.27 mmol, 54% yield).

<sup>1</sup>H NMR (CDCl<sub>3</sub>) δ = 0.92–2.51 (m, 15H), 4.61 (s, 2H), 7.26–7.36 (m, 5H); <sup>13</sup>C NMR (CDCl<sub>3</sub>) δ = 2.10, 13.87, 22.06, 28.38, 28.39, 29.37, 43.08, 66.84 (t, *J* = 2.05 Hz), 71.12, 79.22, 93.75 (q, *J* = 34.44 Hz), 102.69 (q, *J* = 2.21 Hz), 120.77 (q, *J* = 2.21 Hz), 127.45, 127.71, 128.31, 138.08 (q, *J* = 3.58 Hz), 138.69, 140.70; <sup>19</sup>F NMR (CDCl<sub>3</sub>) δ = -57.12 (s, 3F); IR (neat) : 3090, 3032, 2960, 2933, 2864, 2220, 1947, 1806, 1710, 1643, 1577, 1455, 1380, 1240, 1159, 1057 cm<sup>-1</sup>; HRMS (FAB) calcd for C<sub>19</sub>H<sub>22</sub>F<sub>3</sub>INaO (M+Na) 473.0565, found 473.0565.

**(E)-6-Benzyloxy-1,1,1-trifluoro-2-iodo-3,6-dimethyl-2-hepten-4-yne (13b)**

<sup>1</sup>H NMR (CDCl<sub>3</sub>) δ = 1.57 (s, 6H), 2.22 (s, 3H), 4.60 (s, 2H), 7.25–7.36 (m, 5H); <sup>13</sup>C NMR (CDCl<sub>3</sub>) δ = 28.36, 30.98 (q, *J* = 1.64 Hz), 66.80 (t, *J* = 2.06 Hz), 71.07, 80.11, 94.47 (q, *J* = 34.70 Hz), 102.18, 102.20, 120.77 (q, *J* = 273.02 Hz), 127.46, 127.72, 128.32, 128.99, 129.76, 133.67 (q, *J* = 3.58 Hz), 134.48, 138.72; <sup>19</sup>F NMR (CDCl<sub>3</sub>) δ = –57.50 (s, 3F); IR (neat): 3033, 2986, 1703, 1454, 1296, 1241, 1131, 1056 cm<sup>–1</sup>; HRMS (FAB) calcd for C<sub>16</sub>H<sub>16</sub>F<sub>3</sub>INaO (M+Na) 431.0096, found 431.0087.

**(E)-6-Benzyloxy-3-cyclohexyl-1,1,1-trifluoro-2-iodo-6-methyl-2-hepten-4-yne (13c)**

<sup>1</sup>H NMR (CDCl<sub>3</sub>) δ = 1.32–1.83 (m, 17H), 4.65 (s, 2H), 7.26–7.40 (m, 5H); <sup>13</sup>C NMR (CDCl<sub>3</sub>) δ = 2.11, 25.59, 25.72, 25.89, 31.42, 28.45, 28.47, 28.58, 30.21, 45.71, 50.86, 66.95 (t, *J* = 2.51 Hz), 71.11, 71.24, 92.72 (q, *J* = 34.17 Hz), 103.72 (q, *J* = 2.48 Hz), 120.83 (q, *J* = 273.59 Hz), 127.48, 127.75, 128.33, 142.25 (q, *J* = 3.31 Hz); <sup>19</sup>F NMR (CDCl<sub>3</sub>) δ = –56.45 (s, 3F); IR (neat): 3584, 3032, 2932, 2856, 1569, 1451, 1288, 1129, 1056 cm<sup>–1</sup>; HRMS (FAB) calcd for C<sub>21</sub>H<sub>24</sub>F<sub>3</sub>INaO (M+Na) 499.0722, found 499.0723.

**(E)-6-Benzyloxy-1,1,1-trifluoro-2-iodo-6-methyl-3-phenyl-2-hepten-4-yne (13d)**

<sup>1</sup>H NMR (CDCl<sub>3</sub>) δ = 1.56 (s, 6H), 4.56 (s, 2H), 7.26–7.43 (m, 10H); <sup>13</sup>C NMR (CDCl<sub>3</sub>) δ = 28.25, 28.53, 66.90 (t, *J* = 1.66 Hz), 71.19, 80.11, 94.91 (q, *J* = 34.44 Hz), 104.68 (q, *J* = 2.21 Hz), 121.11 (q, *J* = 273.29 Hz), 127.45, 127.82, 128.29, 128.53, 129.04, 130.00, 130.40, 138.01 (q, *J* = 3.85 Hz), 138.58, 138.70, 141.73; <sup>19</sup>F NMR (CDCl<sub>3</sub>) δ = –57.74 (s, 3F); IR (neat): 3584, 2985, 1563, 1454, 1299, 1248, 1132, 1053 cm<sup>–1</sup>; HRMS (FAB) calcd for C<sub>21</sub>H<sub>18</sub>F<sub>3</sub>INaO (M+Na) 493.0252, found 493.0251.

**(E)-6-Benzyloxy-1,1,1-trifluoro-2-iodo-6-methyl-3-*p*-methoxyphenyl-2-hepten-4-yne (13e)**

<sup>1</sup>H NMR (CDCl<sub>3</sub>) δ = 1.59 (s, 6H), 3.86 (s, 3H), 4.59 (s, 2H), 6.93–7.52 (m, 9H); <sup>13</sup>C NMR (CDCl<sub>3</sub>) δ = 28.26, 55.26, 55.28, 66.87 (t, *J* = 2.06 Hz), 71.19, 80.32, 93.67 (q, *J* = 34.17 Hz), 104.21 (q, *J* = 2.48 Hz), 113.67, 114.12, 121.18 (q, *J* = 273.59 Hz), 127.43, 127.69, 127.80, 128.27, 129.62, 133.42, 133.70, 137.59 (q, *J* = 3.58 Hz), 138.62, 158.64, 160.07; <sup>19</sup>F NMR (CDCl<sub>3</sub>) δ = –57.35 (s, 3F); IR (neat) : 3584, 3033, 2985, 2936, 2839, 2212, 1888, 1606, 1508, 1249, 1130, 1041 cm<sup>–1</sup>; HRMS (FAB) calcd for C<sub>22</sub>H<sub>20</sub>F<sub>3</sub>IO<sub>2</sub> (M+) 500.0460, found 500.0463.

**Typical procedure for the preparation of 2-benzyloxy-2-methyl-6-trifluoromethyl-5-tetradecen-3,7-diyne (14a)**

To a solution of (*E*)-6-benzyloxy-3-*n*-butyl-1,1,1-trifluoro-2-iodo-6-methyl-2-hepten-4-yne **13a** (0.450 g, 1.0 mmol), 1-octyne (0.220 g, 2.0 mmol), CuI (0.019 g, 0.10 mmol) in THF (10 mL) was

added Pd(PPh<sub>3</sub>)<sub>4</sub> (0.116 mg, 0.10 mmol) followed by Et<sub>3</sub>N (5.6 mL, 40 mmol) at room temperature. The whole was allowed to warm to 70 °C, then stirred 2 h, and then quenched with sat. NH<sub>4</sub>Cl aq. The mixture was extracted with Et<sub>2</sub>O three times, and the combined organic layers were dried over anhydrous Na<sub>2</sub>SO<sub>4</sub>, and then filtered. The filtrate was evaporated to give the corresponding crude materials, which were purified by silica-gel column chromatography, affording the (Z)-2-benzyloxy-6-*n*-butyl-2-methyl-6-trifluoromethyl-5-pentadecen-3,7-diyne **14a** (0.301 g, 0.70 mmol, 70% yield.)

<sup>1</sup>H NMR (CDCl<sub>3</sub>) δ = 0.88–2.53 (m, 28H), 4.62 (s, 2H), 7.29–7.38 (m, 5H); <sup>13</sup>C NMR (CDCl<sub>3</sub>) δ = 13.90 (d, *J* = 12.35 Hz), 19.77, 22.29 (d, *J* = 43.87 Hz), 28.26, 28.46 (d, *J* = 5.82 Hz), 29.81, 31.24, 35.86, 66.82 (t, *J* = 2.05 Hz), 71.23, 73.60 (q, *J* = 2.51 Hz), 80.99, 103.50, 105.54 (q, *J* = 1.61 Hz), 119.23 (q, *J* = 33.03 Hz), 121.53 (q, *J* = 274.43 Hz), 127.39, 127.76, 128.27, 128.42, 128.48, 128.67, 133.70 (d, *J* = 18.98 Hz), 136.15 (q, *J* = 2.48 Hz), 137.13 (d, *J* = 1.71 Hz), 137.23, 138.83; <sup>19</sup>F NMR (CDCl<sub>3</sub>) δ = –61.58 (s, 3F); IR (neat) : 3032, 2958, 2932, 2861, 2222, 1585, 1347, 1160, 1131, 1057 cm<sup>–1</sup>; HRMS (FAB) calcd for C<sub>27</sub>H<sub>35</sub>F<sub>3</sub>NaO (M+Na) 455.2538, found 455.2542.

**(Z)-7-Benzyloxy-4-*n*-butyl-7-methyl-1-phenyl-3-trifluoromethyl-3-octen-1,5-diyne (14b)**

<sup>1</sup>H NMR (CDCl<sub>3</sub>) δ = 0.91–2.63 (m, 15H), 4.64 (s, 2H), 7.26–7.48 (m, 10H); <sup>13</sup>C NMR (CDCl<sub>3</sub>) δ = 13.89, 15.26, 22.11, 28.49, 29.90, 36.17, 65.85, 66.89 (t, *J* = 2.46 Hz), 71.28, 81.10, 82.07 (q, *J* = 2.48 Hz), 101.43, 106.81 (q, *J* = 1.91 Hz), 118.98 (q, *J* = 33.63 Hz), 121.43 (q, *J* = 274.43 Hz), 122.26, 127.45, 127.79, 128.32, 128.45, 129.09, 131.45, 137.60 (q, *J* = 2.48 Hz), 138.76; <sup>19</sup>F NMR (CDCl<sub>3</sub>) δ = –61.27 (s, 3F); IR (neat): 3033, 2959, 2932, 2862, 2214, 1576, 1491, 1355, 1235, 1133, 1058, 1000 cm<sup>–1</sup>; HRMS (FAB) calcd for C<sub>27</sub>H<sub>27</sub>F<sub>3</sub>NaO (M+Na) 447.1912, found 447.1909.

**(Z)-7-Benzyloxy-4-*n*-butyl-7-methyl-3-trifluoromethyl-1-trimethylsilyl-3-octen-1,5-diyne (14c)**

<sup>1</sup>H NMR (CDCl<sub>3</sub>) δ = 0.25 (s, 9H), 0.93–1.63 (m, 13H), 7.19 (t, *J* = 7.19 Hz, 2H), 4.63 (s, 2H), 7.26–7.38 (m, 5H); <sup>13</sup>C NMR (CDCl<sub>3</sub>) δ = –0.40, 13.80, 22.04, 28.44, 29.71, 36.09, 43.11, 66.87 (t, *J* = 2.06 Hz), 71.25, 80.89, 96.61 (q, *J* = 2.48 Hz), 107.15 (q, *J* = 1.67 Hz), 108.19, 118.97 (q, *J* = 33.60 Hz), 121.22 (q, *J* = 274.16 Hz), 127.45, 127.78, 128.31, 129.26, 138.74, 139.11 (q, *J* = 2.74 Hz); <sup>19</sup>F NMR (CDCl<sub>3</sub>) δ = –61.38 (s, 3F); IR (neat): 3033, 2960, 2933, 2863, 2144, 1578, 1455, 1339, 1253, 1134, 1057 cm<sup>–1</sup>; HRMS (FAB) calcd for C<sub>24</sub>H<sub>31</sub>F<sub>3</sub>NaOSi (M+Na) 443.1994, found 443.1992.

auto

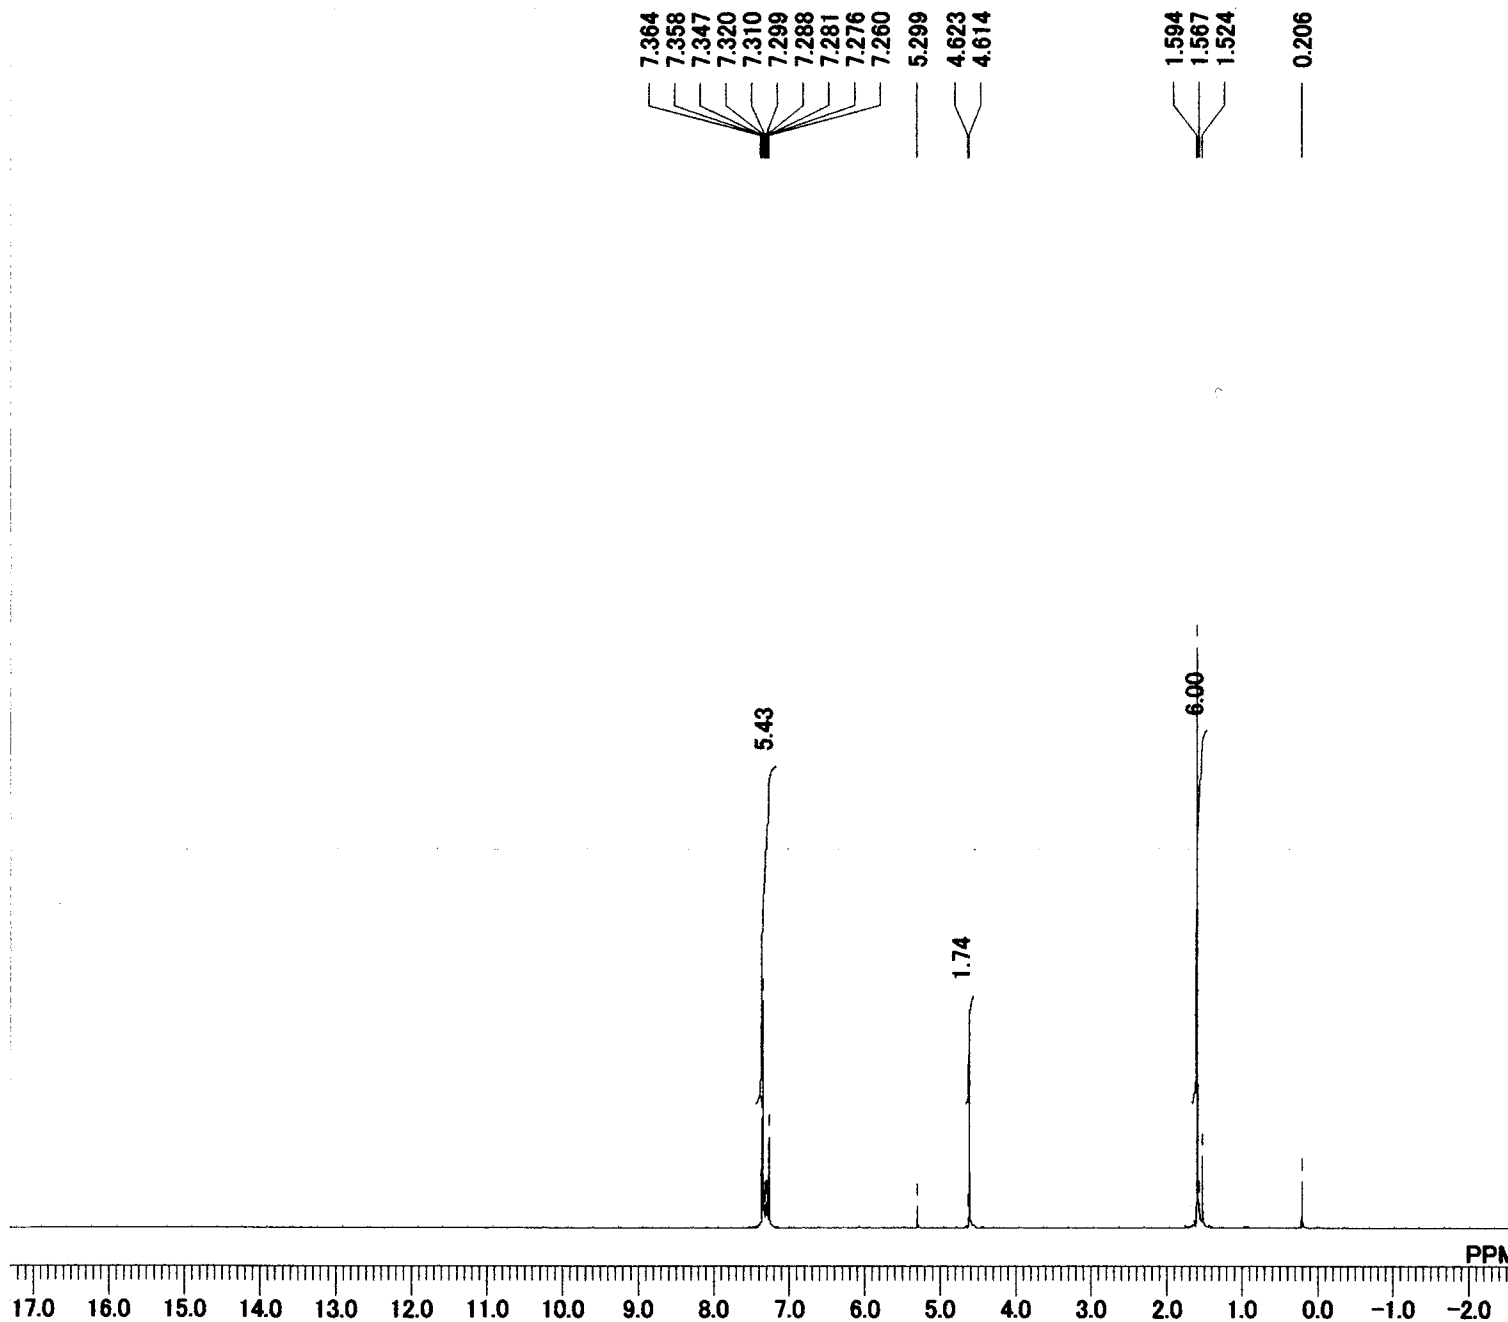

|       |                                 |
|-------|---------------------------------|
| MENUF | 1H                              |
| OBNUC | 1H                              |
| OFR   | 399.65 MHz                      |
| OBSET | 135.40 KHz                      |
| OBFIN | 24.90 Hz                        |
| PW1   | 5.80 usec                       |
| DEADT | 72.10 usec                      |
| PREDL | 0.20000 msec                    |
| IWT   | 1.0000 msec                     |
| POINT | 16384                           |
| SPO   | 16384                           |
| TIMES | 8                               |
| DUMMY | 1                               |
| FREQU | 7992.01 Hz                      |
| FLT   | 4000 Hz                         |
| DELAY | 50.00 usec                      |
| ACQTM | 2.0501 sec                      |
| PD    | 4.9500 sec                      |
| ADBIT | 16                              |
| RGAIN | 21                              |
| BF    | 0.60 Hz                         |
| T1    | 0.00                            |
| T2    | 0.00                            |
| T3    | 90.00                           |
| T4    | 100.00                          |
| EXMOD | NON                             |
| EXPCM | NON:Single.coupled:PW1_ACQTM_PT |
| IRNUC | 1H                              |
| IFR   | 399.65 MHz                      |
| IRSET | 136.90 KHz                      |
| IRFIN | 97.50 Hz                        |
| IRRPW | 45 usec                         |
| IRATN | 511                             |
| DFILE | Rxn273 カラム H.als                |
| SF    | TH5ATFG2                        |
| LKSET | 61.60 KHz                       |
| LKFIN | 79.0 Hz                         |
| LKLEV | 180                             |
| LGAIN | 24                              |
| LKPHS | 250                             |
| LKSIG | 1048                            |
| CSPED | 13 Hz                           |
| FILDC |                                 |
| FILDF |                                 |

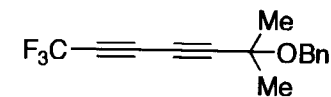

auto

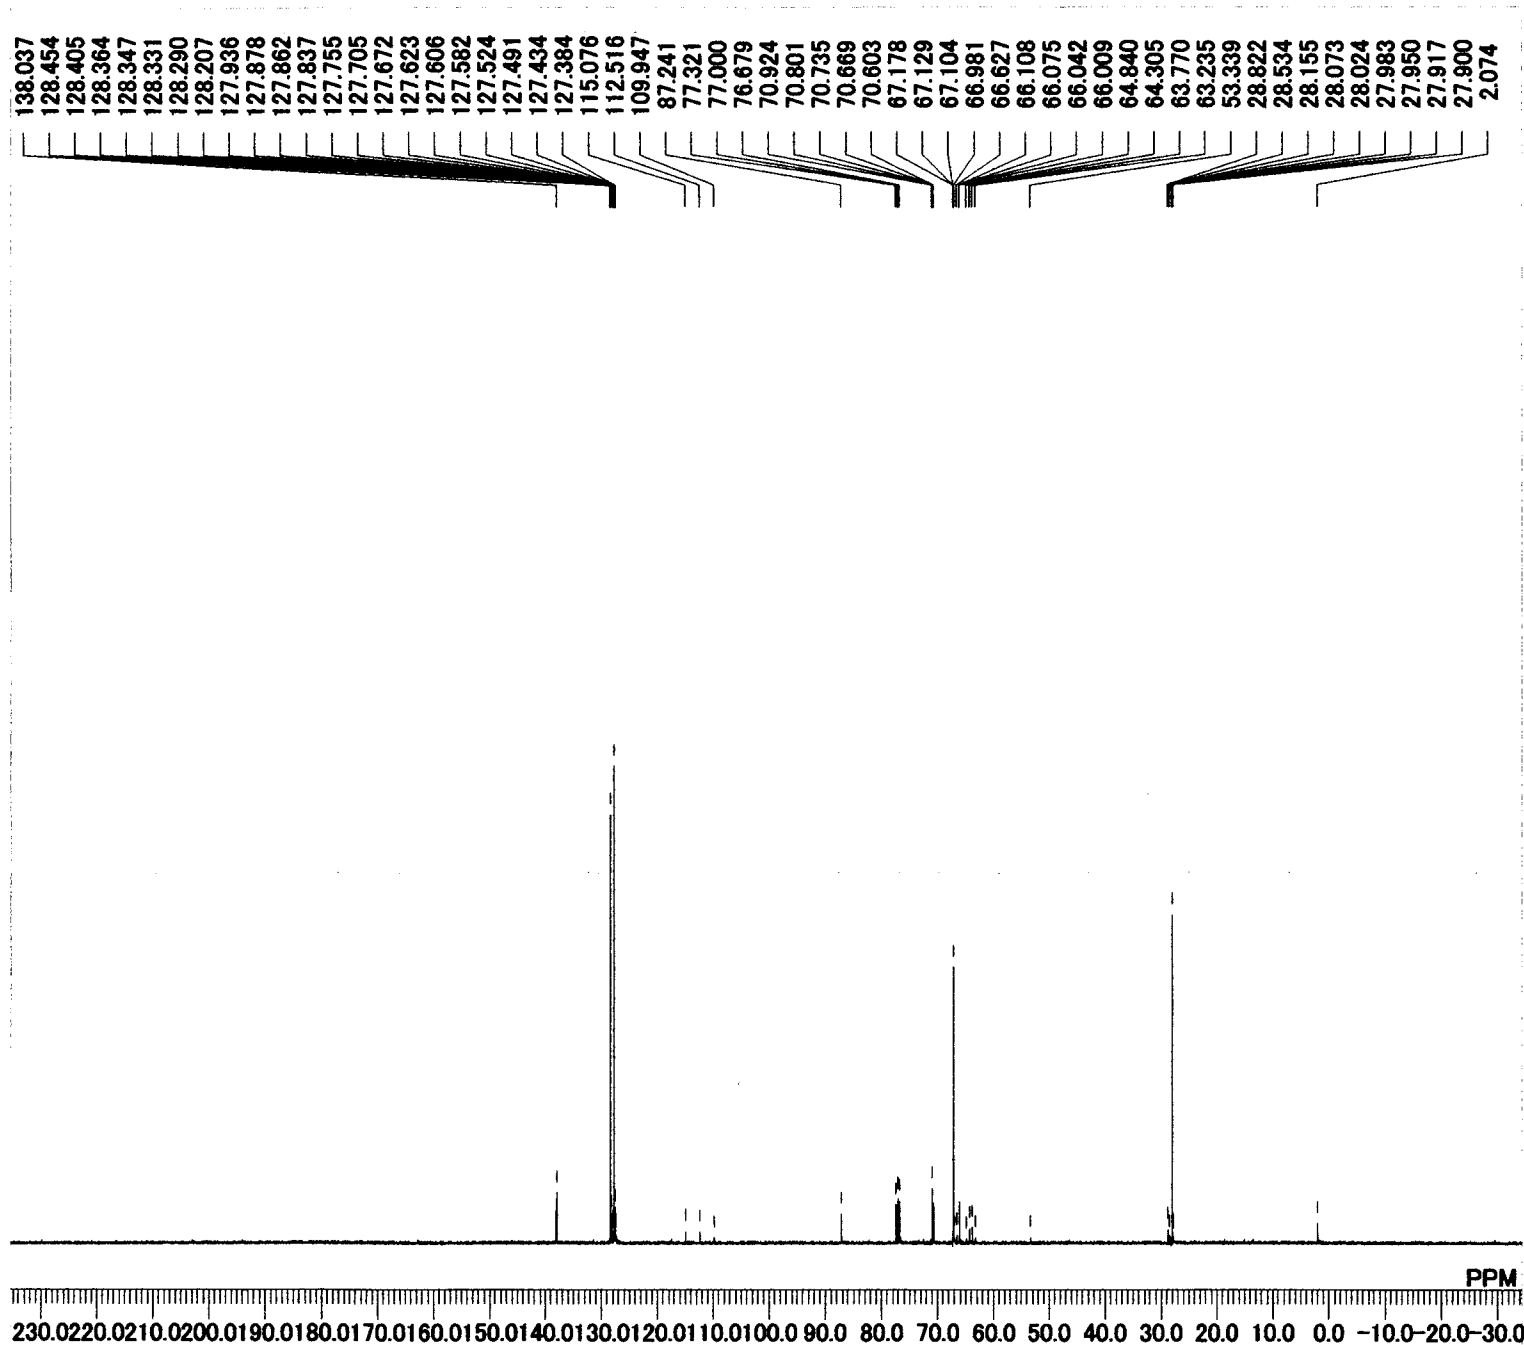

|       |                                      |
|-------|--------------------------------------|
| MENUF | 13C                                  |
| OBNUC | 13C                                  |
| OFR   | 100.40 MHz                           |
| OBSET | 125.00 KHz                           |
| OBFIN | 10500.00 Hz                          |
| PW1   | 6.00 usec                            |
| DEADT | 19.10 usec                           |
| PREDL | 0.20000 msec                         |
| IWT   | 1.0000 msec                          |
| POINT | 32768                                |
| SPO   | 32768                                |
| TIMES | 512                                  |
| DUMMY | 1                                    |
| FREQU | 27118.64 Hz                          |
| FLT   | 13550 Hz                             |
| DELAY | 14.80 usec                           |
| ACQTM | 1.2083 sec                           |
| PD    | 1.7920 sec                           |
| ADBIT | 16                                   |
| RGAIN | 25                                   |
| BF    | 0.10 Hz                              |
| T1    | 0.00                                 |
| T2    | 0.00                                 |
| T3    | 90.00                                |
| T4    | 100.00                               |
| EXMOD | BCM                                  |
| EXPCM | Bilevel.complete.decoupling.Set_IRRF |
| IRNUC | 1H                                   |
| IFR   | 399.65 MHz                           |
| IRSET | 124.00 KHz                           |
| IRFIN | 10500.00 Hz                          |
| IRRPW | 45 usec                              |
| IRATN | 511                                  |
| DFILE | Rxn273 ジイン C.als                     |
| SF    | TH5ATFG2                             |
| LKSET | 61.60 KHz                            |
| LKFIN | 79.0 Hz                              |
| LKLEV | 180                                  |
| LGAIN | 23                                   |
| LKPHS | 250                                  |
| LKSIG | 726                                  |
| CSPED | 10 Hz                                |
| FILDC |                                      |
| FILDF |                                      |

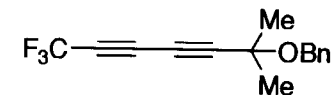

auto

7.397 7.392 7.376 7.370 7.350 7.347 7.336 7.331 7.303 7.298 7.293 7.288 7.281 7.260 5.808 5.804 5.802 5.790 5.786 5.782 5.770 5.768 5.764 5.752 5.748 5.745 4.651 4.644 2.262 2.257 2.244 2.228 2.224 1.608 1.601 1.589 1.570 1.566 1.559 1.547 1.528 1.385 1.365 1.347 1.335 1.329 0.957 0.951 0.938 0.932 0.925 0.920 0.914

MENUF  
OBNUC  
OFR  
OBSET  
OBFIN  
PW1  
DEADT  
PREDL  
IWT  
POINT  
SPO  
TIMES  
DUMMY  
FREQU  
FLT  
DELAY  
ACQTM  
PD  
ADBIT  
RGAIN  
BF  
T1  
T2  
T3  
T4  
EXMOD  
EXPCM  
IRNUC  
IFR  
IRSET  
IRFIN  
IRRPW  
IRATN  
DFILE  
SF  
LKSET  
LKFIN  
LKLEV  
LGAIN  
LKPHS  
LKSIG  
CSPED  
FILDC  
FILDF

1H  
1H  
399.65 MHz  
135.40 KHz  
24.90 Hz  
5.50 usec  
72.20 usec  
0.20000 msec  
1.0000 msec  
16384  
16384  
8  
1  
7992.01 Hz  
4000 Hz  
50.00 usec  
2.0501 sec  
4.9500 sec  
16  
11  
0.10 Hz  
0.00  
0.00  
90.00  
100.00  
NON  
NON:Single.coupled:PW1\_ACQTM\_PL  
1H  
399.65 MHz  
136.90 KHz  
97.50 Hz  
45 usec  
511  
Rxn464 再カラム 1H.als  
TH5ATFG2  
61.60 KHz  
79.0 Hz  
180  
23  
240  
897  
11 Hz

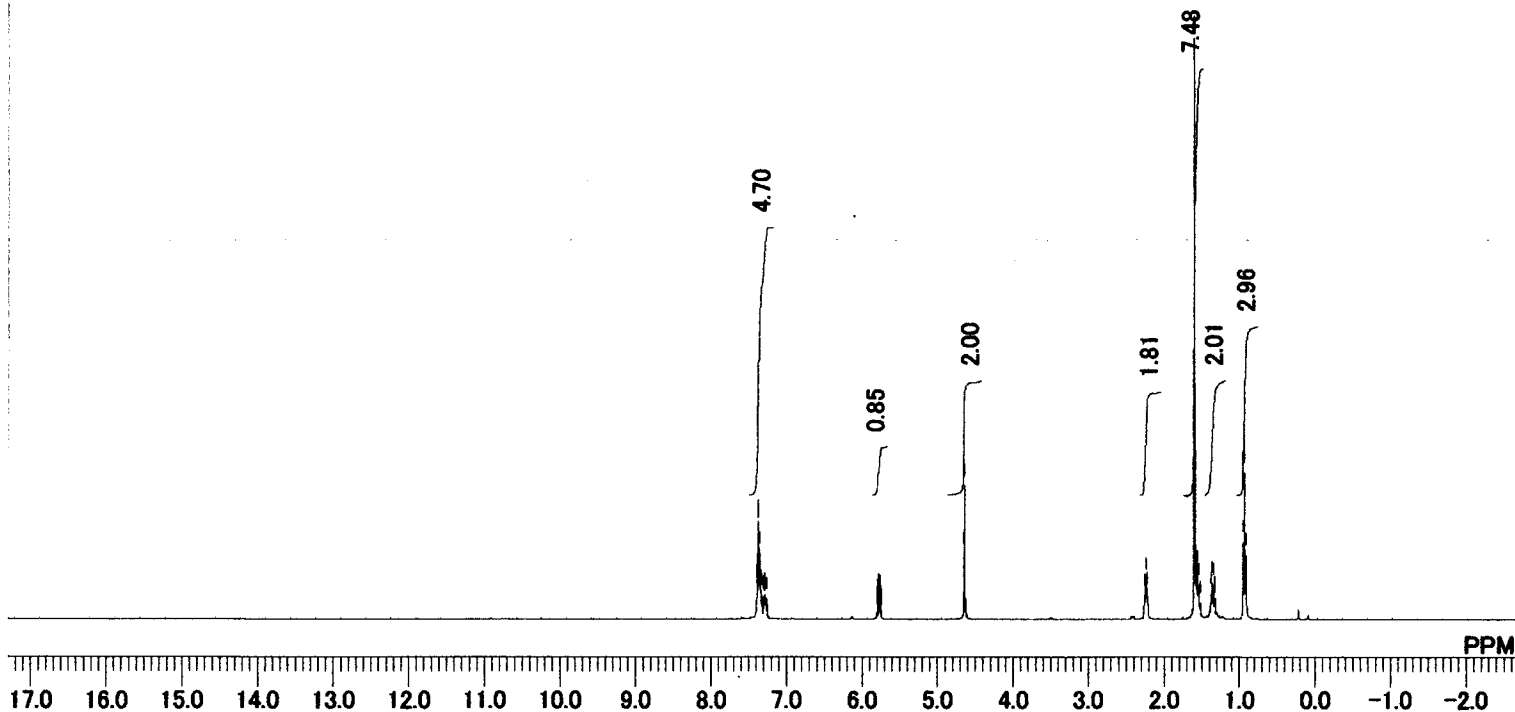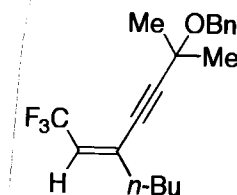



auto

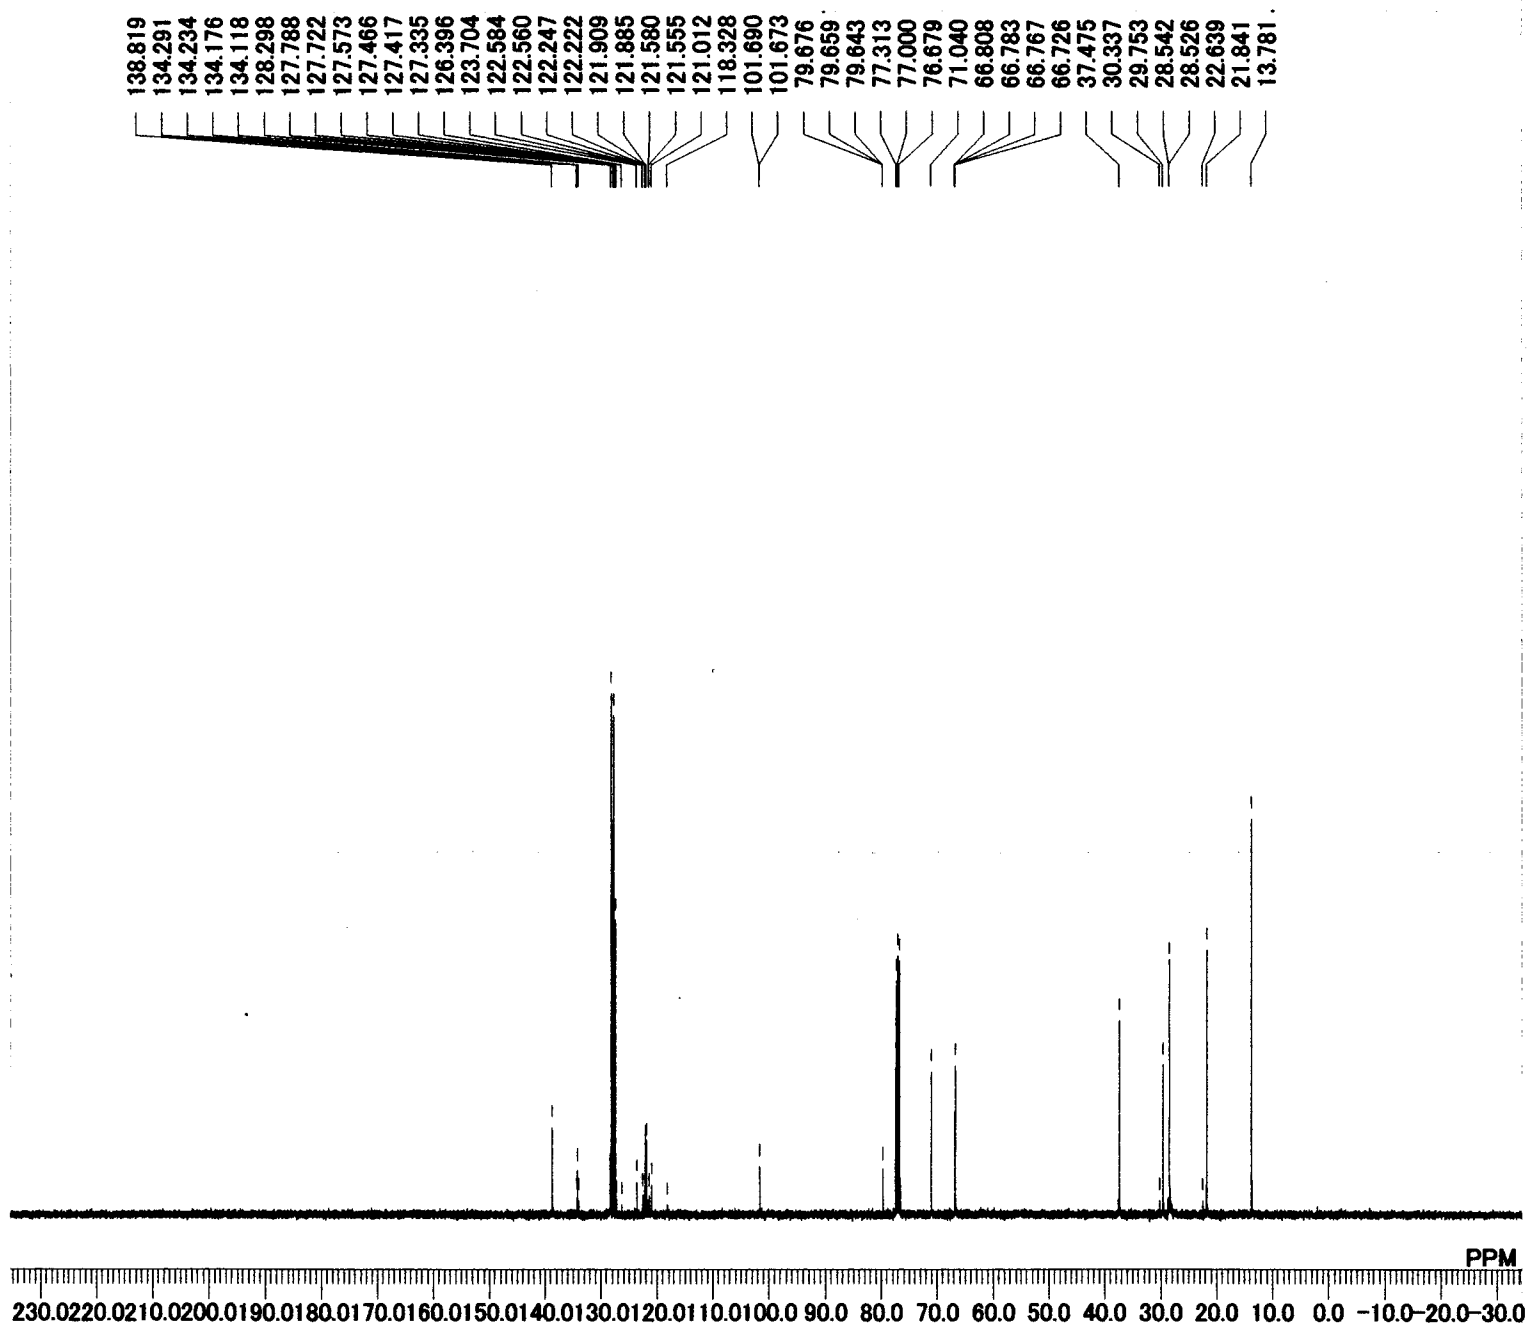

|       |                                      |
|-------|--------------------------------------|
| MENUF | 13C                                  |
| OBNUC | 13C                                  |
| OFR   | 100.40 MHz                           |
| OBSET | 125.00 KHz                           |
| OBFIN | 10500.00 Hz                          |
| PW1   | 6.20 usec                            |
| DEADT | 19.00 usec                           |
| PREDL | 0.20000 msec                         |
| IWT   | 1.0000 msec                          |
| POINT | 32768                                |
| SPO   | 32768                                |
| TIMES | 800                                  |
| DUMMY | 1                                    |
| FREQU | 27118.64 Hz                          |
| FLT   | 13550 Hz                             |
| DELAY | 14.80 usec                           |
| ACQTM | 1.2083 sec                           |
| PD    | 1.7920 sec                           |
| ADBIT | 16                                   |
| RGAIN | 25                                   |
| BF    | 0.10 Hz                              |
| T1    | 0.00                                 |
| T2    | 0.00                                 |
| T3    | 90.00                                |
| T4    | 100.00                               |
| EXMOD | BCM                                  |
| EXPCM | Bilevel.complete.decoupling:Set_IRRF |
| IRNUC | 1H                                   |
| IFR   | 399.65 MHz                           |
| IRSET | 124.00 KHz                           |
| IRFIN | 10500.00 Hz                          |
| IRRPW | 45 usec                              |
| IRATN | 511                                  |
| DFILE | Rxn464 Cu→H C.als                    |
| SF    | TH5ATFG2                             |
| LKSET | 61.60 KHz                            |
| LKFIN | 79.0 Hz                              |
| LKLEV | 180                                  |
| LGAIN | 23                                   |
| LKPHS | 240                                  |
| LKSIG | 853                                  |
| CSPED | 11 Hz                                |
| FILDC |                                      |
| FILDF |                                      |

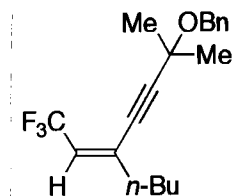

auto

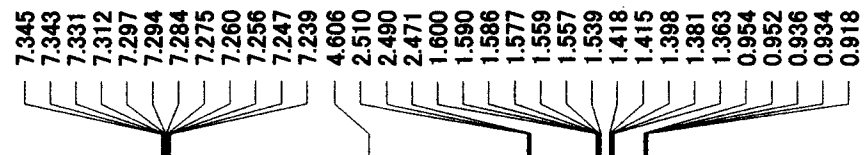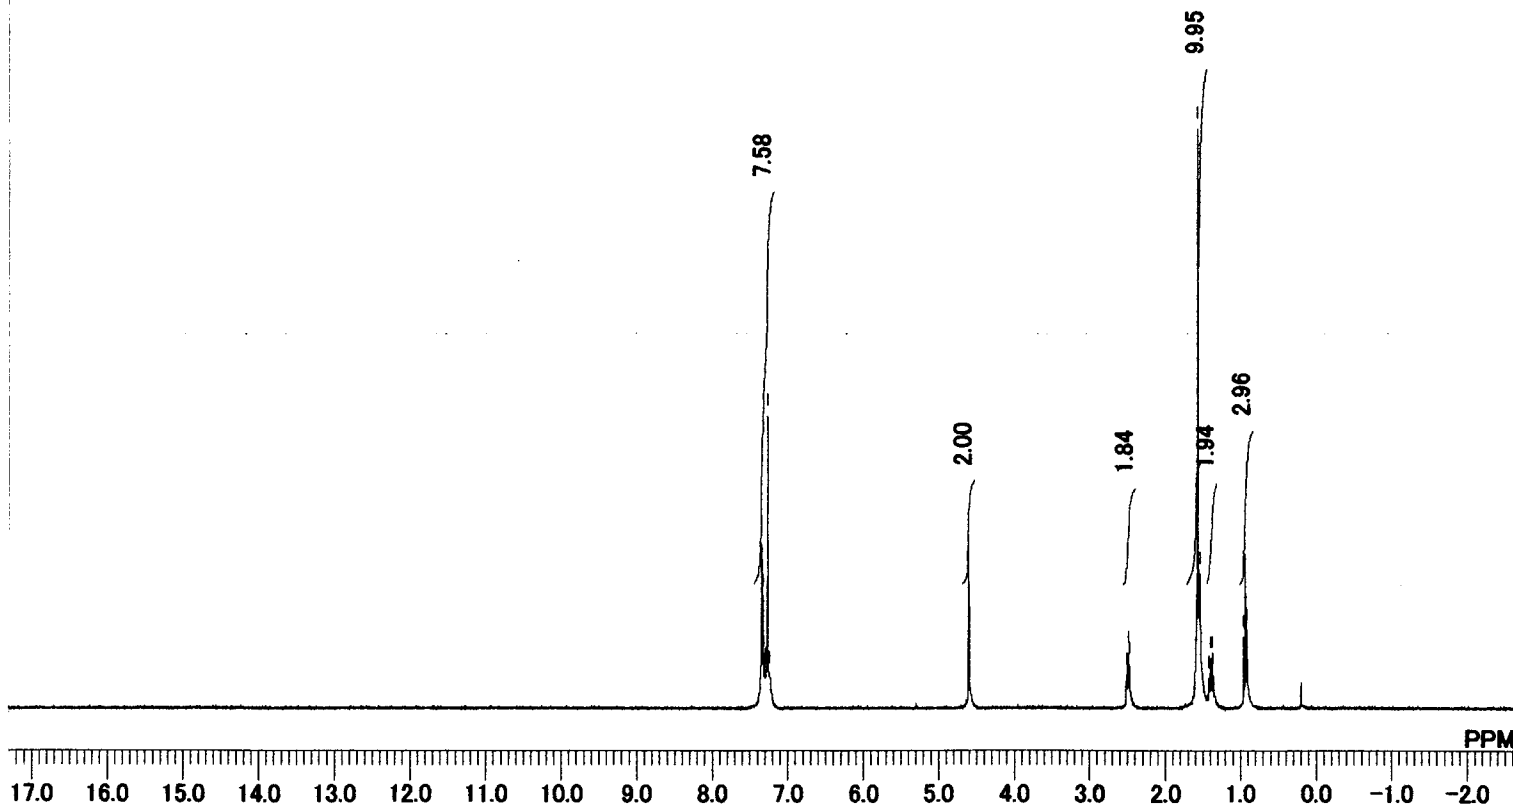

|       |                                 |
|-------|---------------------------------|
| MENUF | 1H                              |
| OBNUC | 1H                              |
| OFR   | 399.65 MHz                      |
| OBSET | 135.40 KHz                      |
| OBFIN | 24.90 Hz                        |
| PW1   | 5.80 usec                       |
| DEADT | 72.10 usec                      |
| PREDL | 0.20000 msec                    |
| IWT   | 1.0000 msec                     |
| POINT | 16384                           |
| SPO   | 16384                           |
| TIMES | 8                               |
| DUMMY | 1                               |
| FREQU | 7992.01 Hz                      |
| FLT   | 4000 Hz                         |
| DELAY | 50.00 usec                      |
| ACQTM | 2.0501 sec                      |
| PD    | 4.9500 sec                      |
| ADBIT | 16                              |
| RGAIN | 20                              |
| BF    | 0.00 Hz                         |
| T1    | 0.00                            |
| T2    | 0.00                            |
| T3    | 90.00                           |
| T4    | 100.00                          |
| EXMOD | NON                             |
| EXPCM | NON:Single.coupled:PW1_ACQTM_PI |
| IRNUC | 1H                              |
| IFR   | 399.65 MHz                      |
| IRSET | 136.90 KHz                      |
| IRFIN | 97.50 Hz                        |
| IRRPW | 45 usec                         |
| IRATN | 511                             |
| DFILE | Rxn376 カラム H.als                |
| SF    | TH5ATFG2                        |
| LKSET | 61.60 KHz                       |
| LKFIN | 79.0 Hz                         |
| LKLEV | 180                             |
| LGAIN | 25                              |
| LKPHS | 193                             |
| LKSIG | 683                             |
| CSPED | 12 Hz                           |
| FILDC |                                 |
| FILDF |                                 |

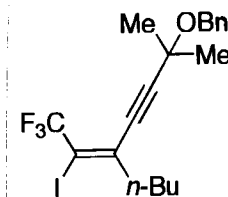

auto

140.696  
138.688  
138.136  
138.103  
138.070  
138.029  
128.306  
127.705  
127.450  
124.848  
122.123  
119.407  
116.682  
102.719  
102.702  
102.678  
102.653  
94.264  
93.926  
93.581  
93.235  
79.223  
77.321  
77.000  
76.679  
71.122  
66.857  
66.841  
66.816  
  
43.081  
29.366  
28.394  
28.378  
22.063  
13.872  
  
2.099

MENUF 13C  
OBNUC 13C  
OFR 100.40 MHz  
OBSET 125.00 KHz  
OBFIN 10500.00 Hz  
PW1 6.20 usec  
DEADT 19.00 usec  
PREDL 0.20000 msec  
IWT 1.0000 msec  
POINT 32768  
SPO 32768  
TIMES 20000  
DUMMY 1  
FREQU 27118.64 Hz  
FLT 13550 Hz  
DELAY 14.80 usec  
ACQTM 1.2083 sec  
PD 1.7920 sec  
ADBIT 16  
RGAIN 25  
BF 0.10 Hz  
T1 0.00  
T2 0.00  
T3 90.00  
T4 100.00  
EXMOD BCM  
EXPCM Bilevel.complete.decoupling:Set\_IRRF  
IRNUC 1H  
IFR 399.65 MHz  
IRSET 124.00 KHz  
IRFIN 10500.00 Hz  
IRRPW 45 usec  
IRATN 511  
DFILE Rxn469 Cu→I C.als  
SF TH5ATFG2  
LKSET 61.60 KHz  
LKFIN 79.0 Hz  
LKLEV 180  
LGAIN 24  
LKPHS 240  
LKSIG 985  
CSPED 10 Hz  
FILDC  
FILDF

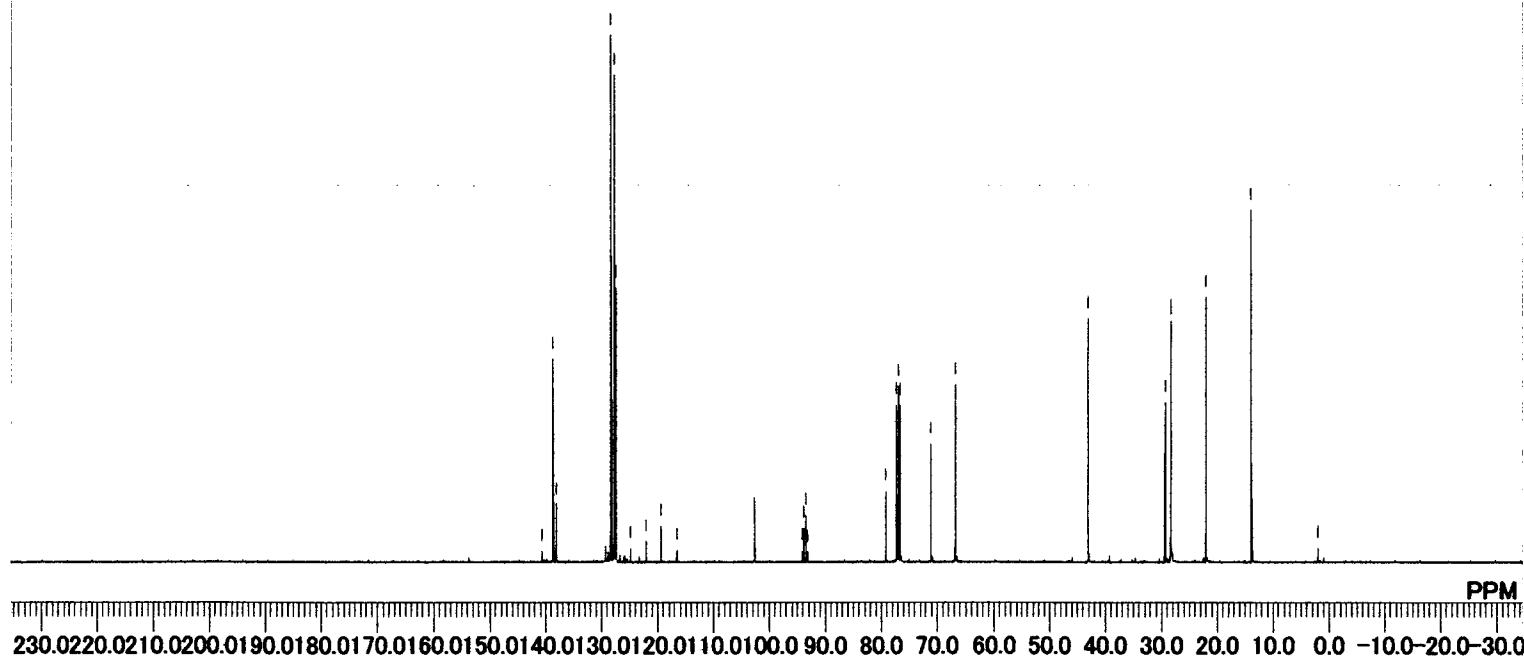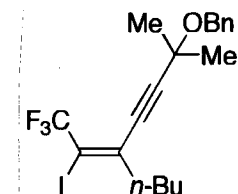

auto

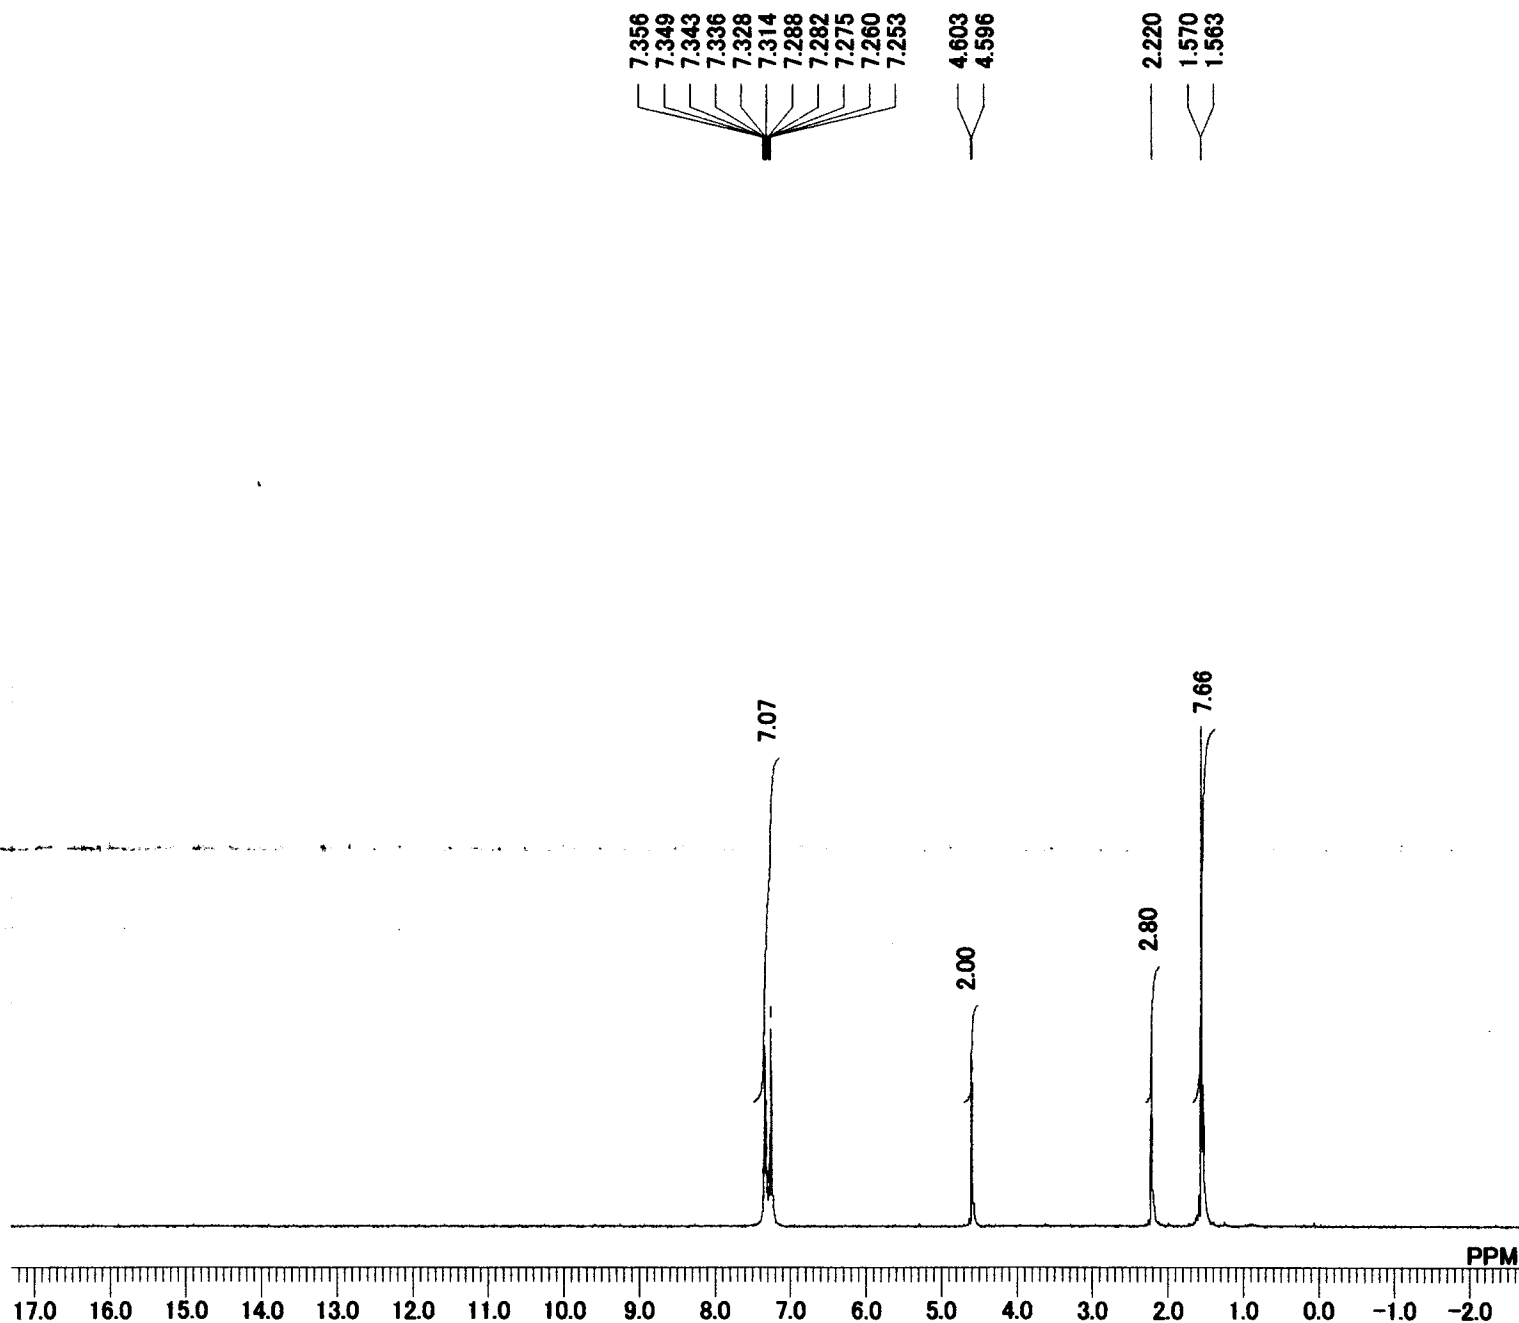

MENUF 1H  
OBNUC 1H  
OFR 399.65 MHz  
OBSET 135.40 KHz  
OBFIN 24.90 Hz  
PW1 5.80 usec  
DEADT 72.10 usec  
PREDL 0.20000 msec  
IWT 1.0000 msec  
POINT 16384  
SPO 16384  
TIMES 8  
DUMMY 1  
FREQU 7992.01 Hz  
FLT 4000 Hz  
DELAY 50.00 usec  
ACQTM 2.0501 sec  
PD 4.9500 sec  
ADBIT 16  
RGAIN 21  
BF 0.10 Hz  
T1 0.00  
T2 0.00  
T3 90.00  
T4 100.00  
EXMOD NON  
EXPCM NON:Single.coupled:PW1\_ACQTM\_PI  
IRNUC 1H  
IFR 399.65 MHz  
IRSET 136.90 KHz  
IRFIN 97.50 Hz  
IRRPW 45 usec  
IRATN 511  
DFILE 悪.als  
SF TH5ATFG2  
LKSET 61.60 KHz  
LKFIN 79.0 Hz  
LKLEV 180  
LGAIN 25  
LKPHS 193  
LKSIG 679  
CSPED 11 Hz  
FILDC  
FILDF

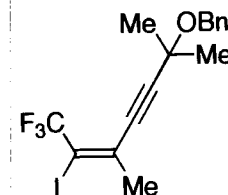

auto

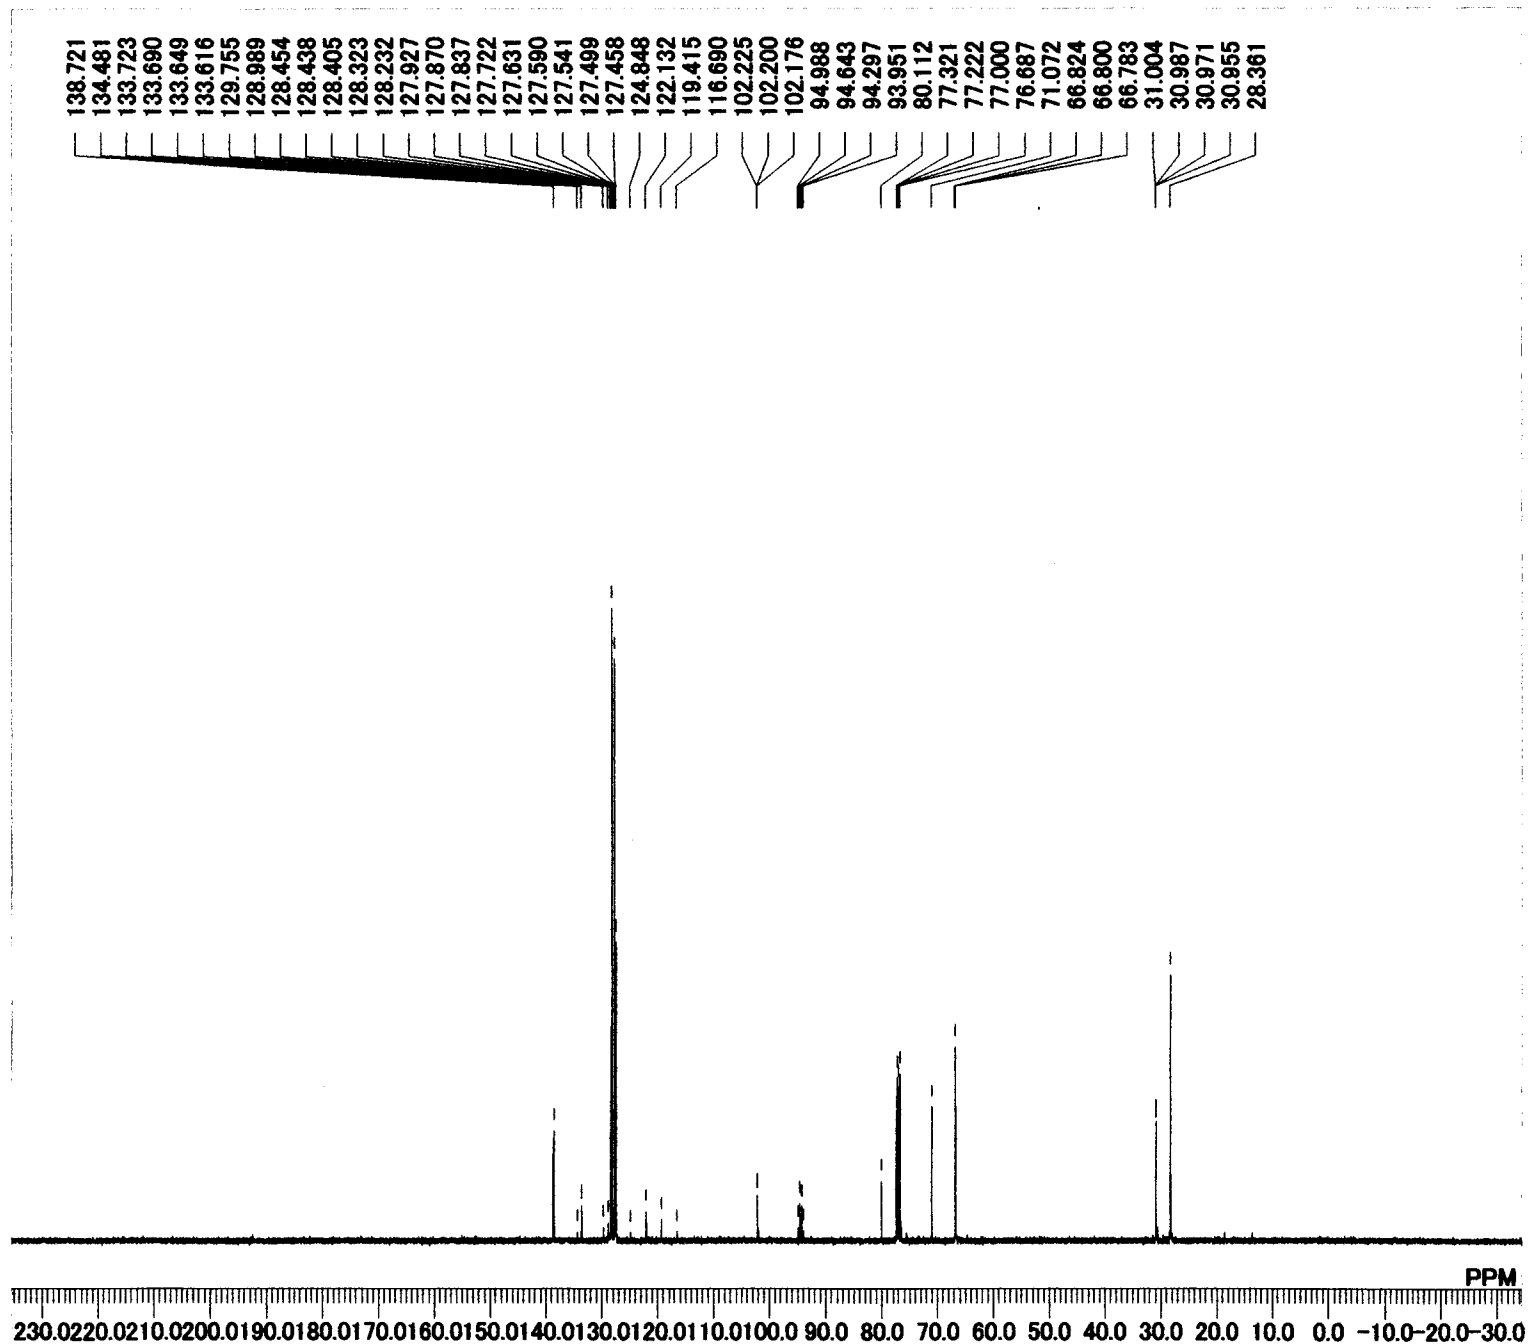

|       |                                      |
|-------|--------------------------------------|
| MENUF | 13C                                  |
| OBNUC | 13C                                  |
| OFR   | 100.40 MHz                           |
| OBSET | 125.00 KHz                           |
| OBFIN | 10500.00 Hz                          |
| PW1   | 6.20 usec                            |
| DEADT | 19.00 usec                           |
| PREDL | 0.20000 msec                         |
| IWT   | 1.0000 msec                          |
| POINT | 32768                                |
| SPO   | 32768                                |
| TIMES | 2000                                 |
| DUMMY | 1                                    |
| FREQU | 27118.64 Hz                          |
| FLT   | 13550 Hz                             |
| DELAY | 14.80 usec                           |
| ACQTM | 1.2083 sec                           |
| PD    | 1.7920 sec                           |
| ADBIT | 16                                   |
| RGAIN | 25                                   |
| BF    | 0.10 Hz                              |
| T1    | 0.00                                 |
| T2    | 0.00                                 |
| T3    | 90.00                                |
| T4    | 100.00                               |
| EXMOD | BCM                                  |
| EXPCM | Bilevel.complete.decoupling.Set_IRRF |
| IRNUC | 1H                                   |
| IFR   | 399.65 MHz                           |
| IRSET | 124.00 KHz                           |
| IRFIN | 10500.00 Hz                          |
| IRRPW | 45 usec                              |
| IRATN | 511                                  |
| DFILE | Rxn377 carbocup Me C.als             |
| SF    | TH5ATFG2                             |
| LKSET | 61.60 KHz                            |
| LKFIN | 79.0 Hz                              |
| LKLEV | 180                                  |
| LGAIN | 23                                   |
| LKPHS | 240                                  |
| LKSIG | 794                                  |
| CSPED | 11 Hz                                |
| FILDC |                                      |
| FILDF |                                      |

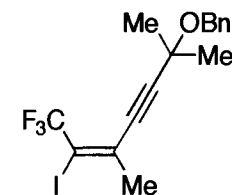

auto

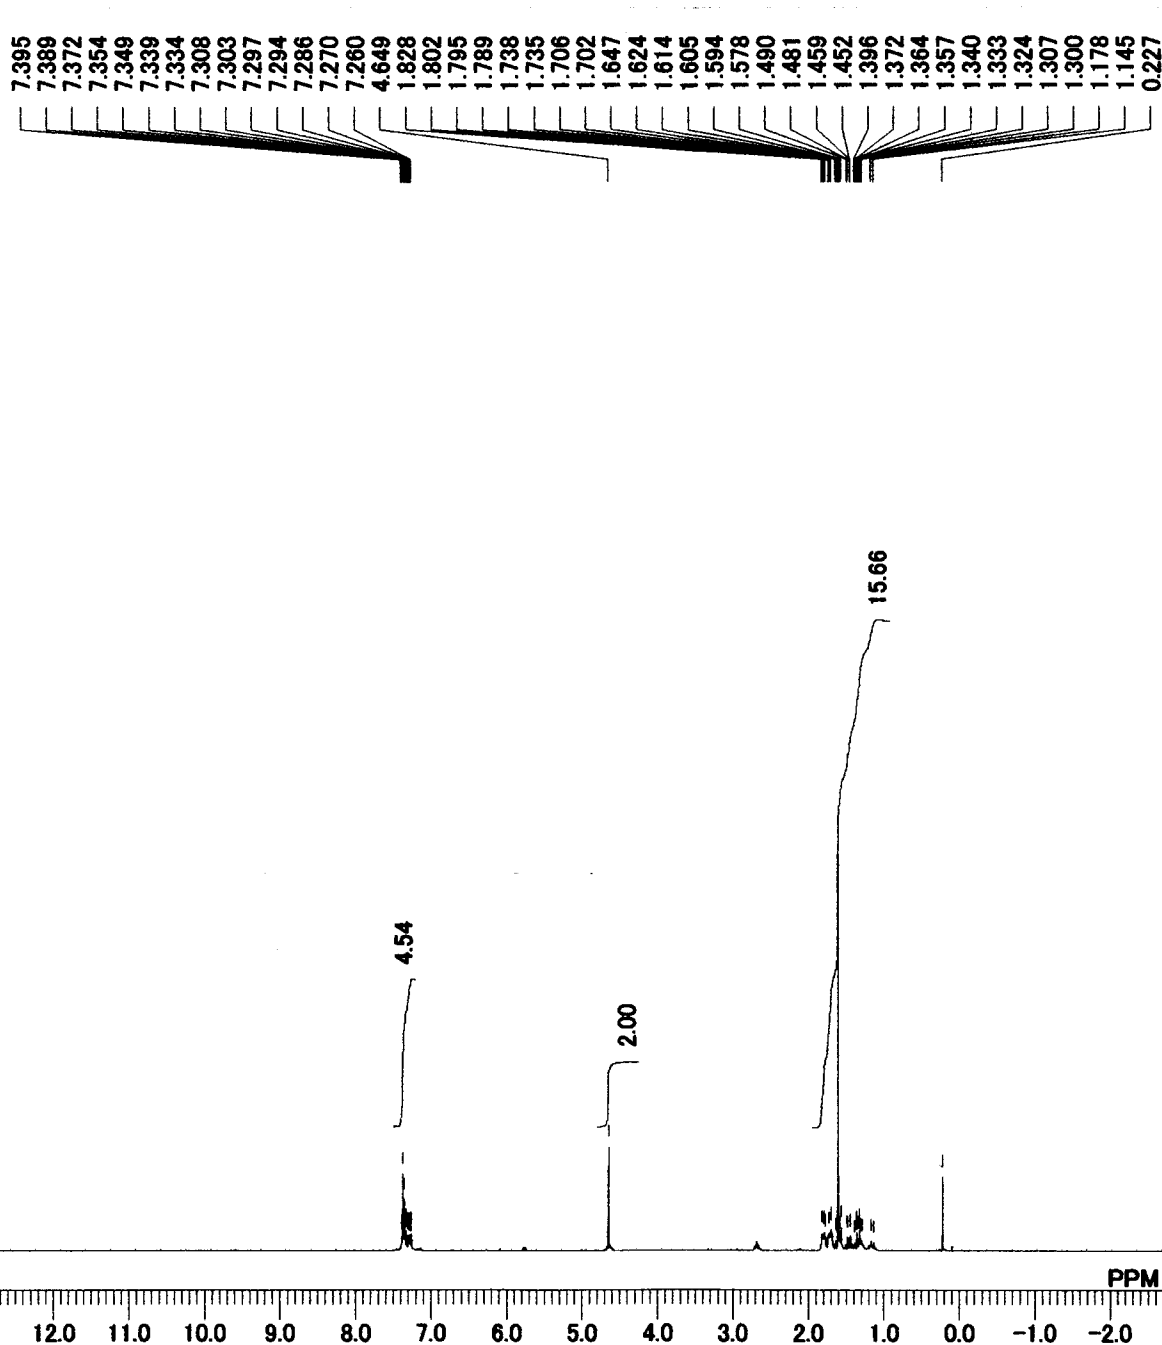

|       |                                 |
|-------|---------------------------------|
| MENUF | 1H                              |
| OBNUC | 1H                              |
| OFR   | 399.65 MHz                      |
| OBSET | 135.40 KHz                      |
| OBFIN | 24.90 Hz                        |
| PW1   | 5.50 usec                       |
| DEADT | 72.20 usec                      |
| PREDL | 0.20000 msec                    |
| IWT   | 1.0000 msec                     |
| POINT | 16384                           |
| SPO   | 16384                           |
| TIMES | 8                               |
| DUMMY | 1                               |
| FREQU | 7992.01 Hz                      |
| FLT   | 4000 Hz                         |
| DELAY | 50.00 usec                      |
| ACQTM | 2.0501 sec                      |
| PD    | 4.9500 sec                      |
| ADBIT | 16                              |
| RGAIN | 11                              |
| BF    | 0.10 Hz                         |
| T1    | 0.00                            |
| T2    | 0.00                            |
| T3    | 90.00                           |
| T4    | 100.00                          |
| EXMOD | NON                             |
| EXPCM | NON:Single.coupled:PW1_ACQTM_PI |
| IRNUC | 1H                              |
| IFR   | 399.65 MHz                      |
| IRSET | 136.90 KHz                      |
| IRFIN | 97.50 Hz                        |
| IRRPW | 45 usec                         |
| IRATN | 511                             |
| DFILE | Rxn481 c-Hex カラム H.als          |
| SF    | TH5ATFG2                        |
| LKSET | 61.60 KHz                       |
| LKFIN | 79.0 Hz                         |
| LKLEV | 180                             |
| LGAIN | 25                              |
| LKPHS | 240                             |
| LKSIG | 1749                            |
| CSPED | 14 Hz                           |
| FILDC |                                 |
| FILDF |                                 |

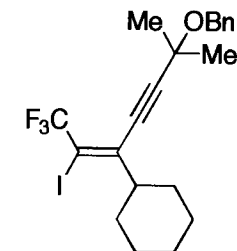

auto

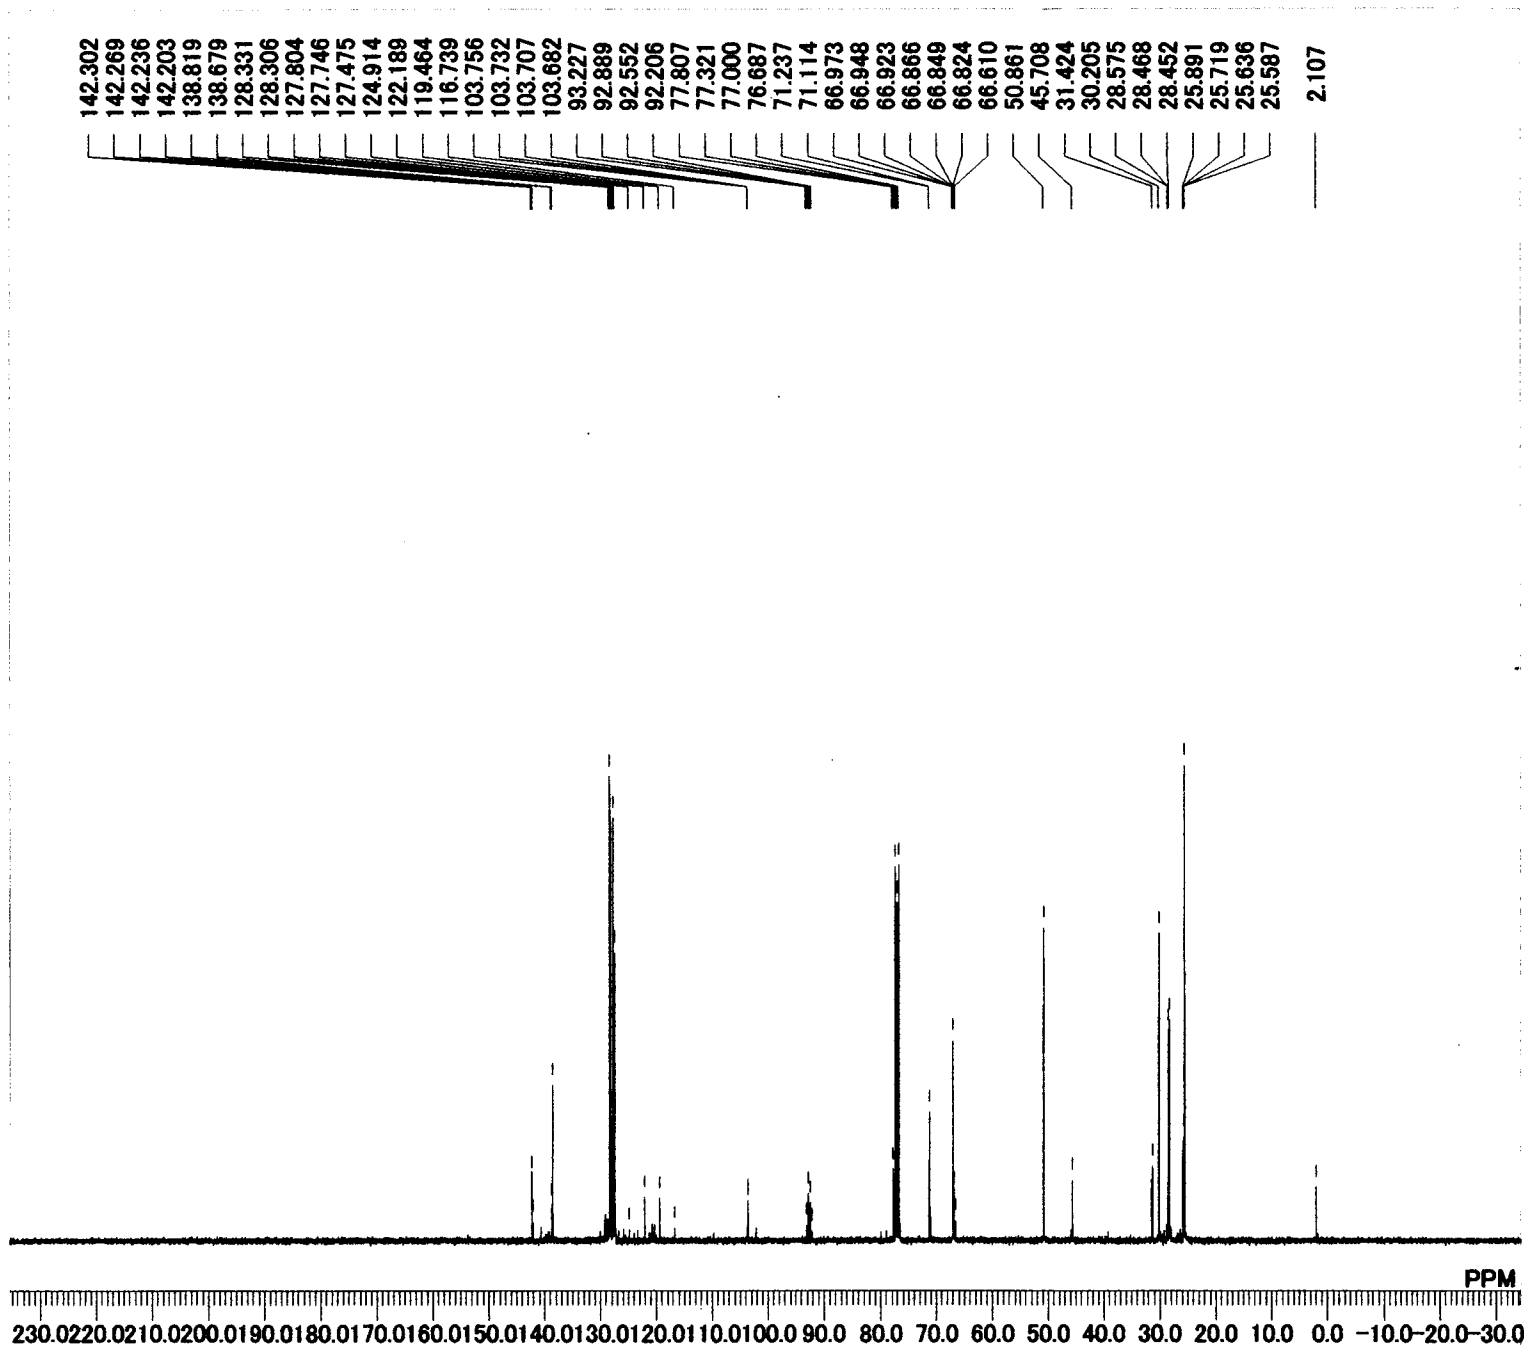

|       |                                      |
|-------|--------------------------------------|
| MENUF | 13C                                  |
| OBNUC | 13C                                  |
| OFR   | 100.40 MHz                           |
| OBSET | 125.00 KHz                           |
| OBFIN | 10500.00 Hz                          |
| PW1   | 6.20 usec                            |
| DEADT | 19.00 usec                           |
| PREDL | 0.20000 msec                         |
| IWT   | 1.0000 msec                          |
| POINT | 32768                                |
| SPO   | 32768                                |
| TIMES | 10000                                |
| DUMMY | 1                                    |
| FREQU | 27118.64 Hz                          |
| FLT   | 13550 Hz                             |
| DELAY | 14.80 usec                           |
| ACQTM | 1.2083 sec                           |
| PD    | 1.7920 sec                           |
| ADBIT | 16                                   |
| RGAIN | 25                                   |
| BF    | 0.10 Hz                              |
| T1    | 0.00                                 |
| T2    | 0.00                                 |
| T3    | 90.00                                |
| T4    | 100.00                               |
| EXMOD | BCM                                  |
| EXPCM | Bilevel.complete.decoupling:Set_IRRF |
| IRNUC | 1H                                   |
| IFR   | 399.65 MHz                           |
| IRSET | 124.00 KHz                           |
| IRFIN | 10500.00 Hz                          |
| IRRPW | 45 usec                              |
| IRATN | 511                                  |
| DFILE | Rxn481 c-Hex カラム C.als               |
| SF    | TH5ATFG2                             |
| LKSET | 61.60 KHz                            |
| LKFIN | 79.0 Hz                              |
| LKLEV | 180                                  |
| LGAIN | 24                                   |
| LKPHS | 240                                  |
| LKSIG | 1197                                 |
| CSPED | 13 Hz                                |
| FILDC |                                      |
| FILDF |                                      |

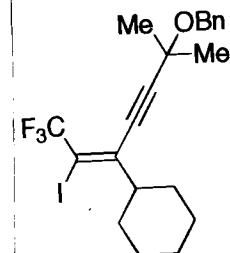

auto

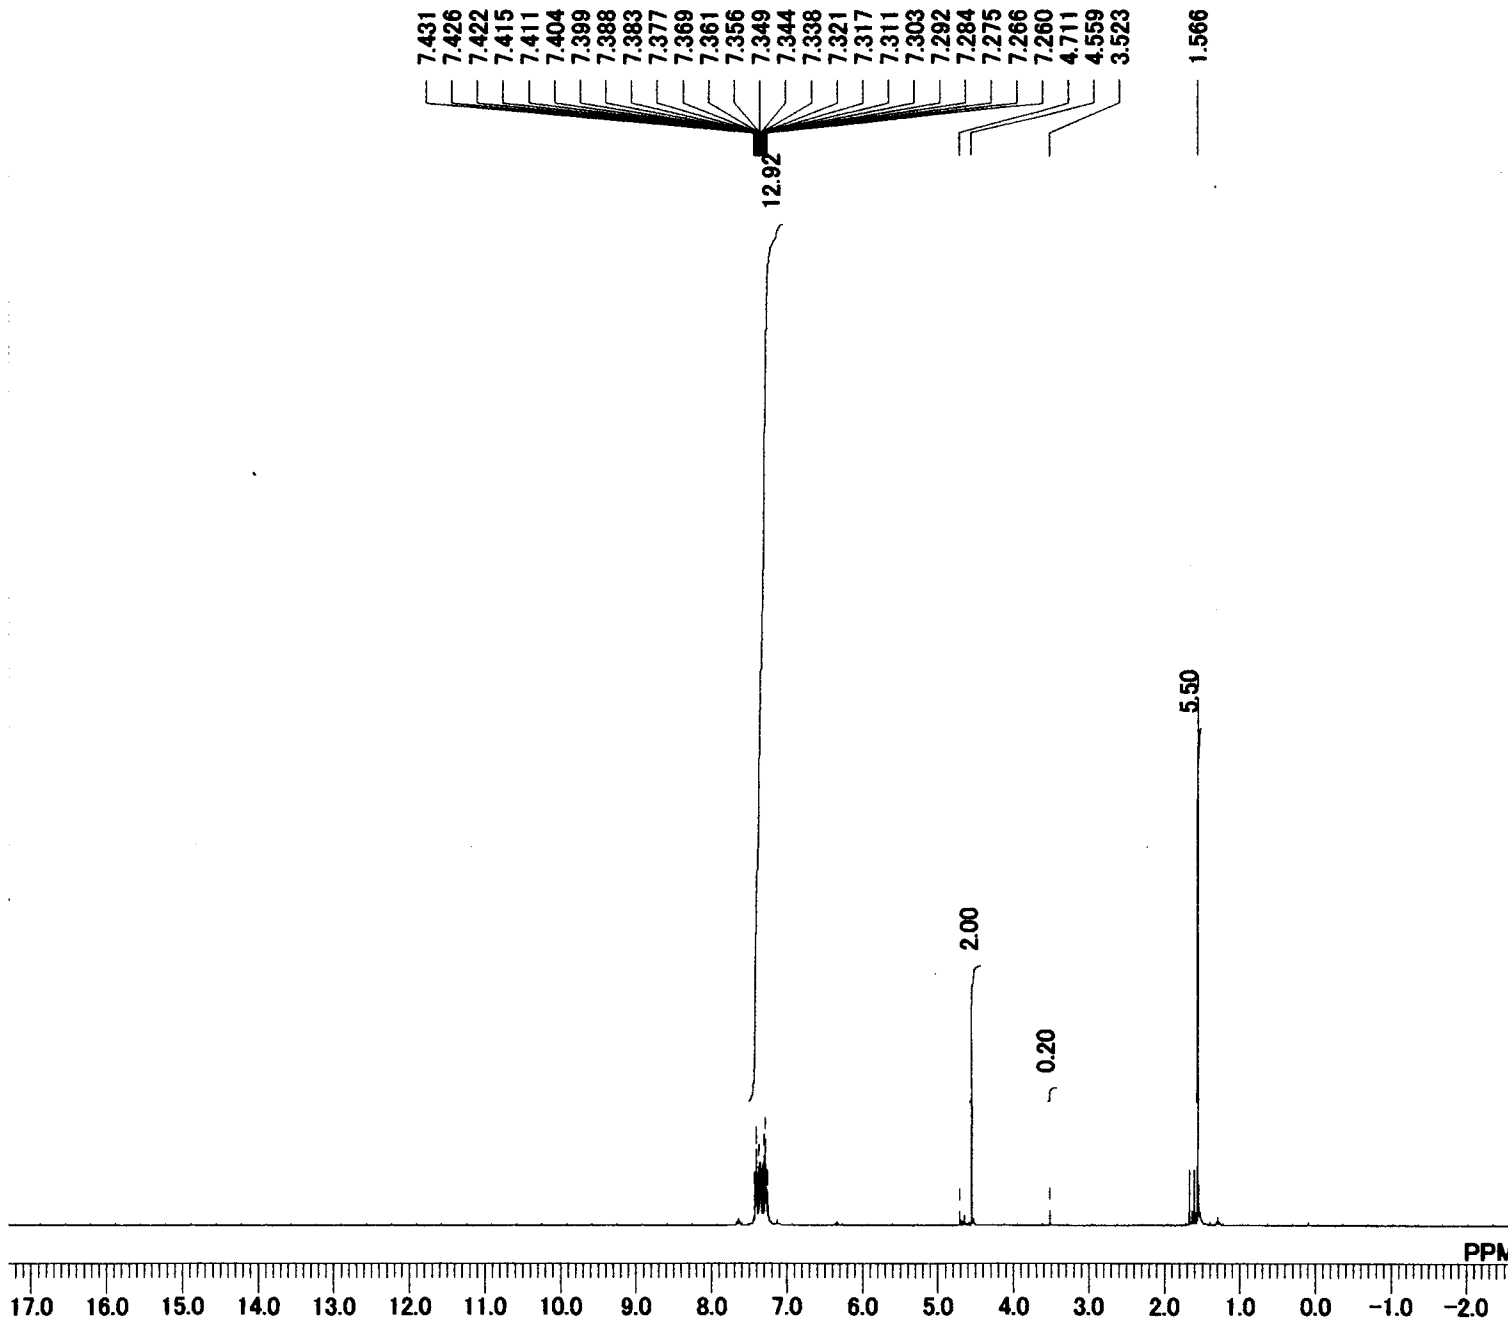

|       |                                 |
|-------|---------------------------------|
| MENUF | 1H                              |
| OBNUC | 1H                              |
| OFR   | 399.65 MHz                      |
| OBSET | 135.40 KHz                      |
| OBFIN | 24.90 Hz                        |
| PW1   | 5.50 usec                       |
| DEADT | 72.20 usec                      |
| PREDL | 0.20000 msec                    |
| IWT   | 1.0000 msec                     |
| POINT | 16384                           |
| SPO   | 16384                           |
| TIMES | 8                               |
| DUMMY | 1                               |
| FREQU | 7992.01 Hz                      |
| FLT   | 4000 Hz                         |
| DELAY | 50.00 usec                      |
| ACQTM | 2.0501 sec                      |
| PD    | 4.9500 sec                      |
| ADBIT | 16                              |
| RGAIN | 13                              |
| BF    | 0.10 Hz                         |
| T1    | 0.00                            |
| T2    | 0.00                            |
| T3    | 90.00                           |
| T4    | 100.00                          |
| EXMOD | NON                             |
| EXPCM | NON:Single.coupled:PW1_ACQTM_PI |
| IRNUC | 1H                              |
| IFR   | 399.65 MHz                      |
| IRSET | 136.90 KHz                      |
| IRFIN | 97.50 Hz                        |
| IRRPW | 45 usec                         |
| IRATN | 511                             |
| DFILE | Rxn480 カラム H.als                |
| SF    | TH5ATFG2                        |
| LKSET | 61.60 KHz                       |
| LKFIN | 79.0 Hz                         |
| LKLEV | 180                             |
| LGAIN | 24                              |
| LKPHS | 240                             |
| LKSIG | 1274                            |
| CSPED | 14 Hz                           |
| FILDC |                                 |
| FILDF |                                 |

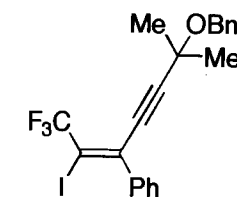



auto

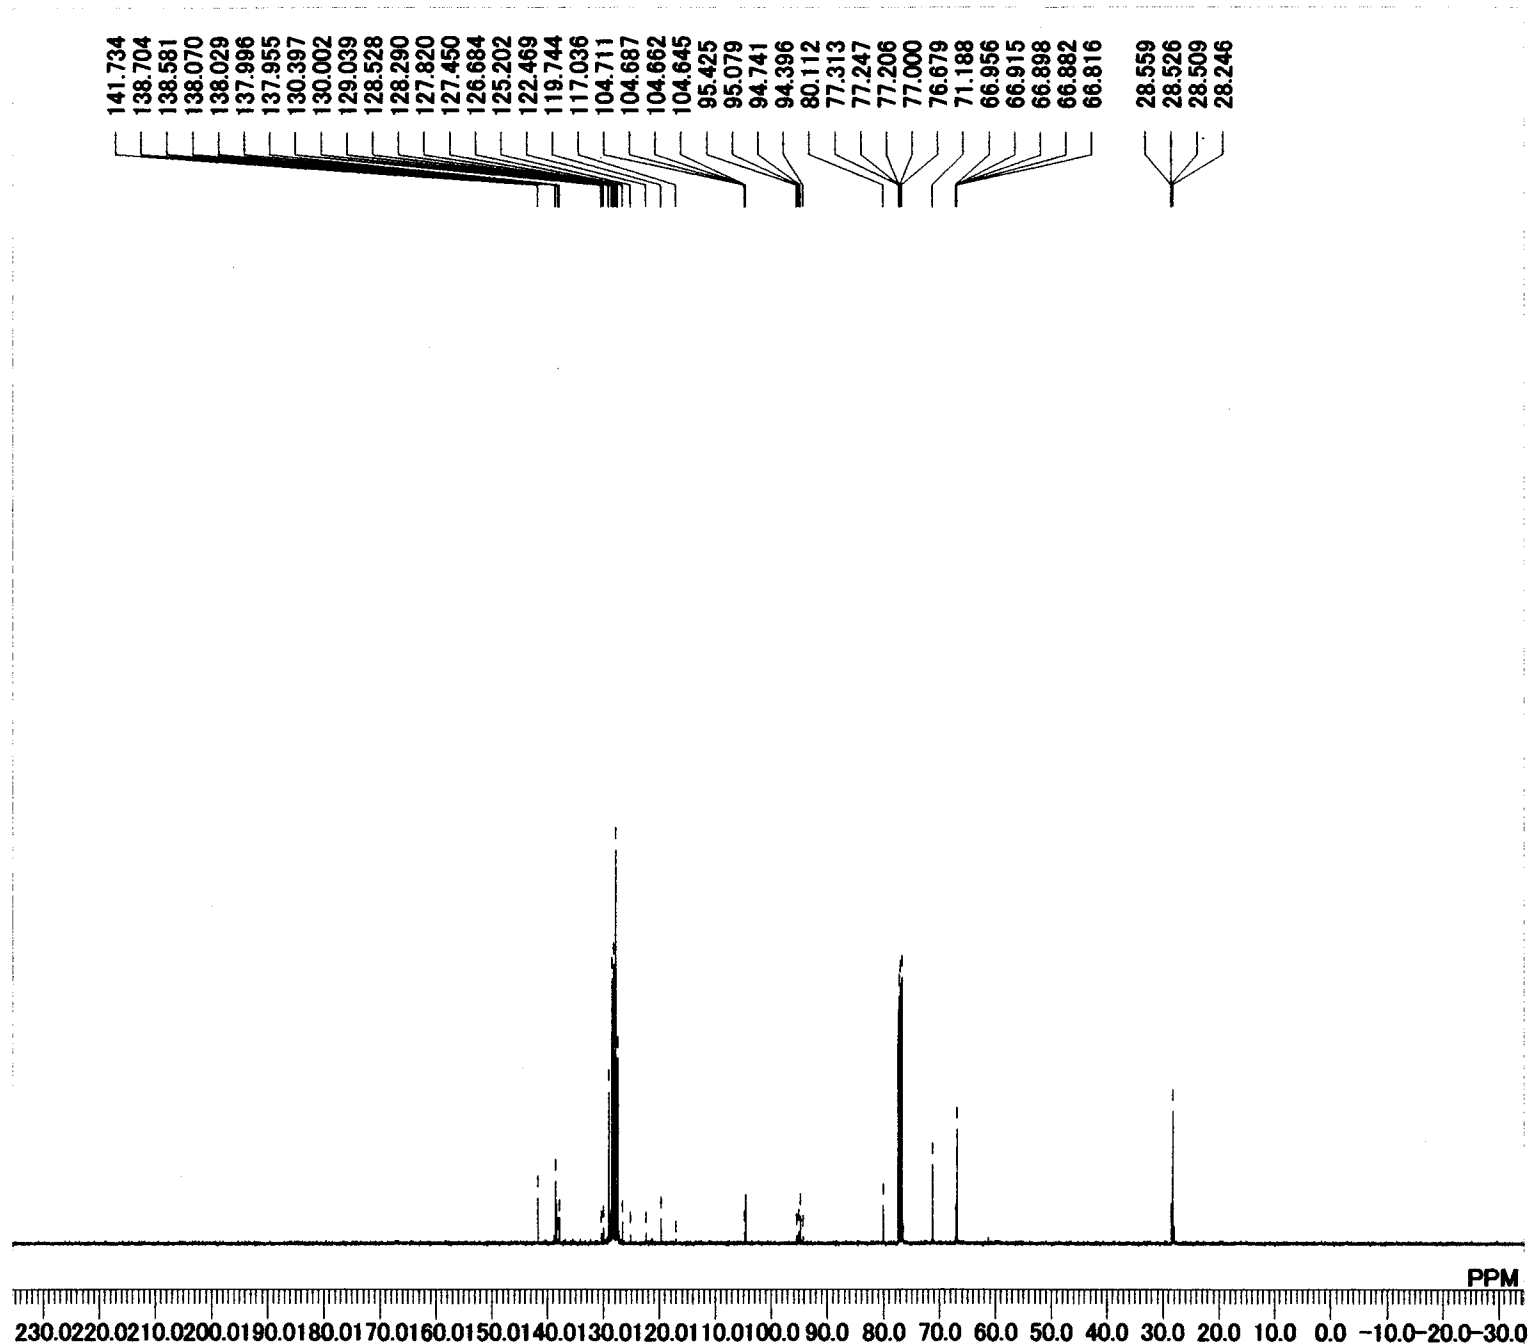

|       |                                      |
|-------|--------------------------------------|
| MENUF | 13C                                  |
| OBNUC | 13C                                  |
| OFR   | 100.40 MHz                           |
| OBSET | 125.00 KHz                           |
| OBFIN | 10500.00 Hz                          |
| PW1   | 6.20 usec                            |
| DEADT | 19.00 usec                           |
| PREDL | 0.20000 msec                         |
| IWT   | 1.0000 msec                          |
| POINT | 32768                                |
| SPO   | 32768                                |
| TIMES | 20000                                |
| DUMMY | 1                                    |
| FREQU | 27118.64 Hz                          |
| FLT   | 13550 Hz                             |
| DELAY | 14.80 usec                           |
| ACQTM | 1.2083 sec                           |
| PD    | 1.7920 sec                           |
| ADBIT | 16                                   |
| RGAIN | 25                                   |
| BF    | 0.10 Hz                              |
| T1    | 0.00                                 |
| T2    | 0.00                                 |
| T3    | 90.00                                |
| T4    | 100.00                               |
| EXMOD | BCM                                  |
| EXPCM | Bilevel.complete.decoupling:Set_IRRF |
| IRNUC | 1H                                   |
| IFR   | 399.65 MHz                           |
| IRSET | 124.00 KHz                           |
| IRFIN | 10500.00 Hz                          |
| IRRPW | 45 usec                              |
| IRATN | 511                                  |
| DFILE | Rxn.480 13C.als                      |
| SF    | TH5ATFG2                             |
| LKSET | 61.60 KHz                            |
| LKFIN | 79.0 Hz                              |
| LKLEV | 180                                  |
| LGAIN | 24                                   |
| LKPHS | 240                                  |
| LKSIG | 1243                                 |
| CSPED | 14 Hz                                |
| FILDC |                                      |
| FILDF |                                      |

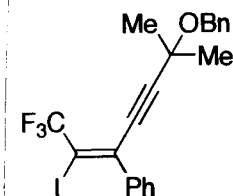

auto

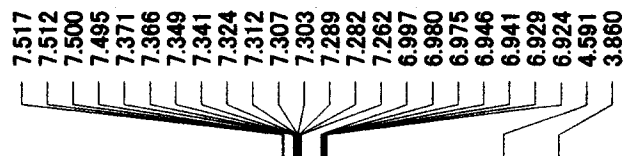

1.586

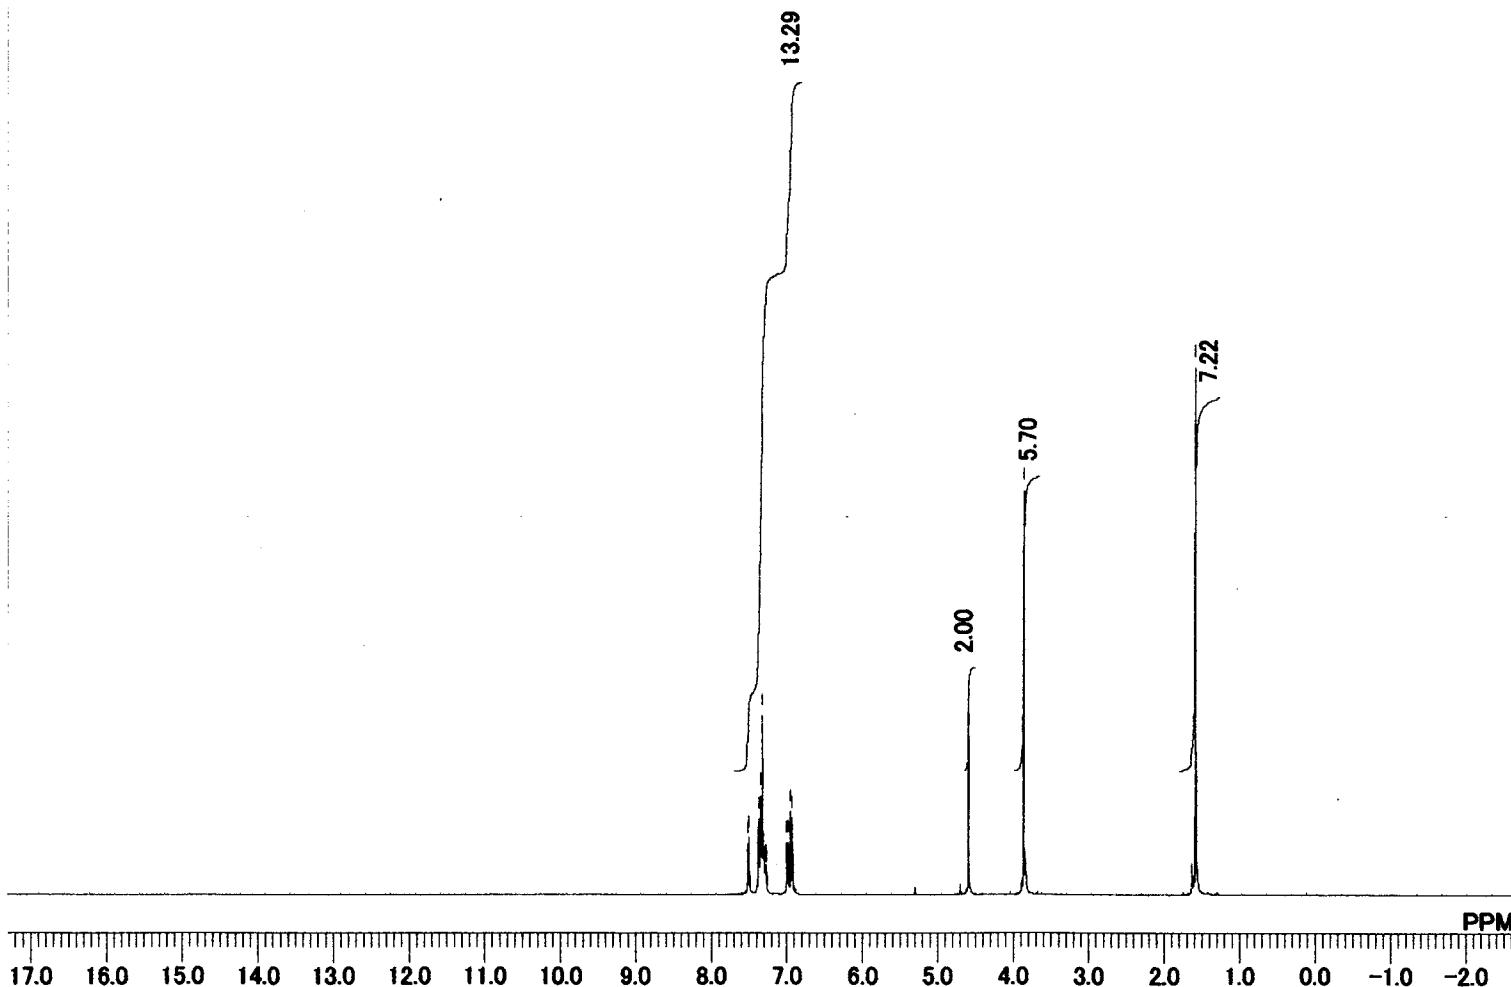

|       |                                 |
|-------|---------------------------------|
| MENUF | 1H                              |
| OBNUC | 1H                              |
| OFR   | 399.65 MHz                      |
| OBSET | 135.40 KHz                      |
| OBFIN | 24.90 Hz                        |
| PW1   | 5.50 usec                       |
| DEADT | 72.20 usec                      |
| PREDL | 0.20000 msec                    |
| IWT   | 1.0000 msec                     |
| POINT | 16384                           |
| SPO   | 16384                           |
| TIMES | 8                               |
| DUMMY | 1                               |
| FREQU | 7992.01 Hz                      |
| FLT   | 4000 Hz                         |
| DELAY | 50.00 usec                      |
| ACQTM | 2.0501 sec                      |
| PD    | 4.9500 sec                      |
| ADBIT | 16                              |
| RGAIN | 12                              |
| BF    | 0.10 Hz                         |
| T1    | 0.00                            |
| T2    | 0.00                            |
| T3    | 90.00                           |
| T4    | 100.00                          |
| EXMOD | NON                             |
| EXPCM | NON:Single.coupled:PW1_ACQTM_PI |
| IRNUC | 1H                              |
| IFR   | 399.65 MHz                      |
| IRSET | 136.90 KHz                      |
| IRFIN | 97.50 Hz                        |
| IRRPW | 45 usec                         |
| IRATN | 511                             |
| DFILE | Rxn483 PMP カラム H.als            |
| SF    | TH5ATFG2                        |
| LKSET | 61.60 KHz                       |
| LKFIN | 79.0 Hz                         |
| LKLEV | 180                             |
| LGAIN | 25                              |
| LKPHS | 240                             |
| LKSIG | 1200                            |
| CSPED | 12 Hz                           |
| FILDC |                                 |
| FILDF |                                 |

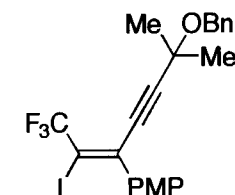

auto

160.068  
158.644  
138.622  
137.642  
137.609  
137.576  
137.535  
133.699  
133.419  
129.623  
128.273  
127.796  
127.689  
127.425  
125.268  
122.543  
119.818  
117.093  
114.121  
113.668  
104.242  
104.217  
104.193  
104.168  
94.182  
93.844  
93.507  
93.161  
80.318  
77.321  
77.000  
76.687  
71.188  
66.890  
66.874  
66.849  
55.282  
55.257  
28.262

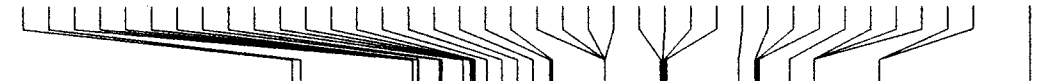

|       |                                       |
|-------|---------------------------------------|
| MENUF | 13C                                   |
| OBNUC | 13C                                   |
| OFR   | 100.40 MHz                            |
| OBSET | 125.00 KHz                            |
| OBFIN | 10500.00 Hz                           |
| PW1   | 6.20 usec                             |
| DEADT | 19.00 usec                            |
| PREDL | 0.20000 msec                          |
| IWT   | 1.0000 msec                           |
| POINT | 32768                                 |
| SPO   | 32768                                 |
| TIMES | 10000                                 |
| DUMMY | 1                                     |
| FREQU | 27118.64 Hz                           |
| FLT   | 13550 Hz                              |
| DELAY | 14.80 usec                            |
| ACQTM | 1.2083 sec                            |
| PD    | 1.7920 sec                            |
| ADBIT | 16                                    |
| RGAIN | 25                                    |
| BF    | 0.10 Hz                               |
| T1    | 0.00                                  |
| T2    | 0.00                                  |
| T3    | 90.00                                 |
| T4    | 100.00                                |
| EXMOD | BCM                                   |
| EXPCM | Bilevel.complete.decoupling: Set_IRRF |
| IRNUC | 1H                                    |
| IFR   | 399.65 MHz                            |
| IRSET | 124.00 KHz                            |
| IRFIN | 10500.00 Hz                           |
| IRRPW | 45 usec                               |
| IRATN | 511                                   |
| DFILE | Rxn483 PMP カラム C.als                  |
| SF    | TH5ATFG2                              |
| LKSET | 61.60 KHz                             |
| LKFIN | 79.0 Hz                               |
| LKLEV | 180                                   |
| LGAIN | 24                                    |
| LKPHS | 240                                   |
| LKSIG | 997                                   |
| CSPED | 12 Hz                                 |
| FILDC |                                       |
| FILDF |                                       |

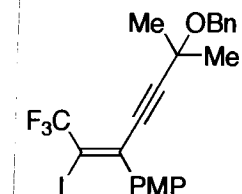

230.0220.0210.0200.0190.0180.0170.0160.0150.0140.0130.0120.0110.0100.090.080.070.060.050.040.030.020.010.00-10.0-20.0-30.0

auto

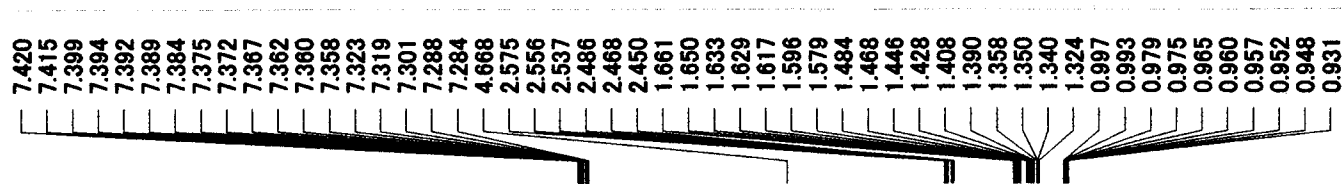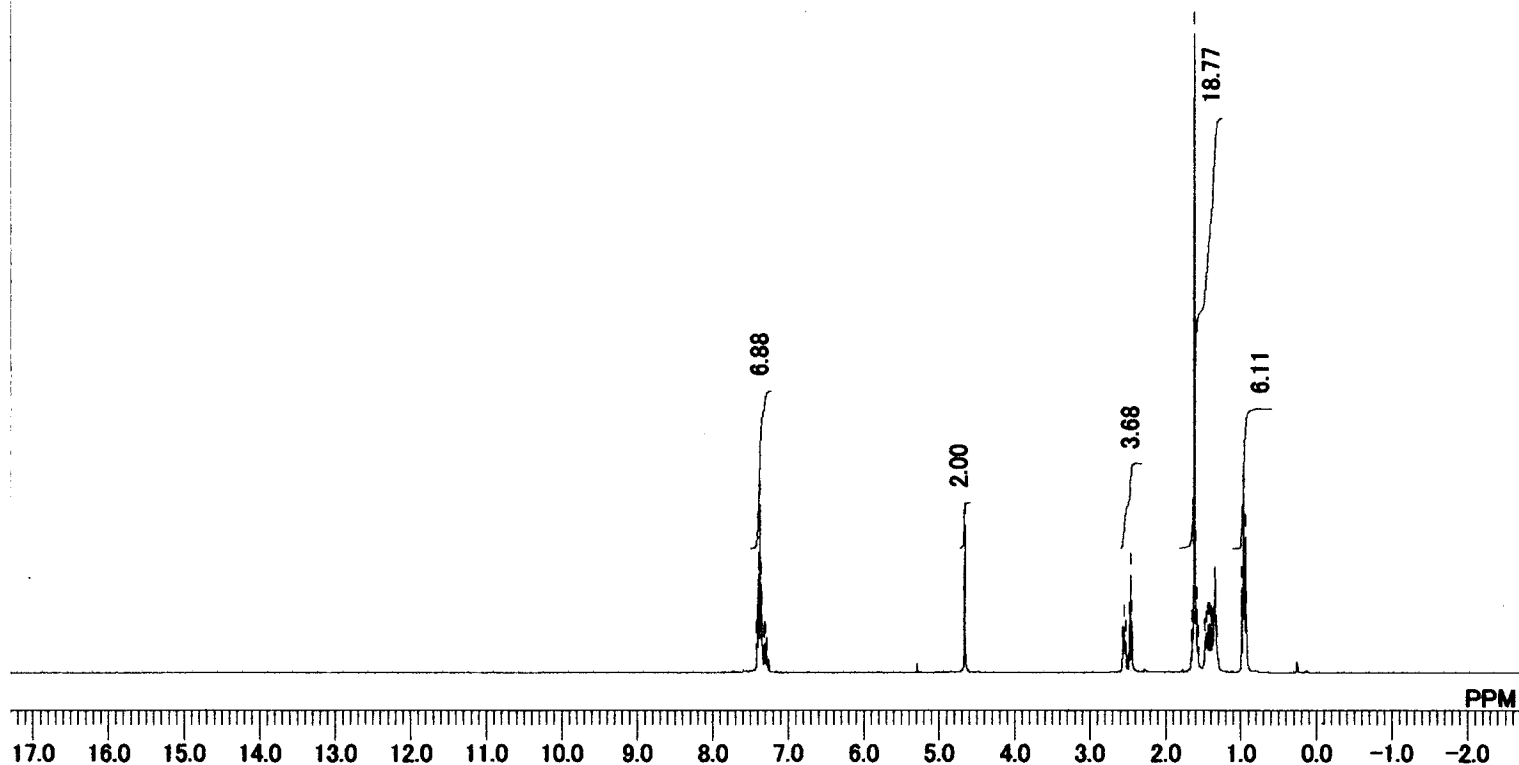

|       |                                 |
|-------|---------------------------------|
| MENUF | 1H                              |
| OBNUC | 1H                              |
| OFR   | 399.65 MHz                      |
| OBSET | 135.40 KHz                      |
| OBFIN | 24.90 Hz                        |
| PW1   | 5.50 usec                       |
| DEADT | 72.20 usec                      |
| PREDL | 0.20000 msec                    |
| IWT   | 1.0000 msec                     |
| POINT | 16384                           |
| SPO   | 16384                           |
| TIMES | 8                               |
| DUMMY | 1                               |
| FREQU | 7992.01 Hz                      |
| FLT   | 4000 Hz                         |
| DELAY | 50.00 usec                      |
| ACQTM | 2.0501 sec                      |
| PD    | 4.9500 sec                      |
| ADBIT | 16                              |
| RGAIN | 8                               |
| BF    | 0.00 Hz                         |
| T1    | 0.00                            |
| T2    | 0.00                            |
| T3    | 90.00                           |
| T4    | 100.00                          |
| EXMOD | NON                             |
| EXPCM | NON:Single.coupled:PW1_ACQTM_PI |
| IRNUC | 1H                              |
| IFR   | 399.65 MHz                      |
| IRSET | 136.90 KHz                      |
| IRFIN | 97.50 Hz                        |
| IRRPW | 45 usec                         |
| IRATN | 511                             |
| DFILE | Rxn463 sonogashira H.als        |
| SF    | TH5ATFG2                        |
| LKSET | 61.60 KHz                       |
| LKFIN | 79.0 Hz                         |
| LKLEV | 180                             |
| LGAIN | 26                              |
| LKPHS | 240                             |
| LKSIG | 1692                            |
| CSPED | 13 Hz                           |
| FILDC |                                 |
| FILDF |                                 |

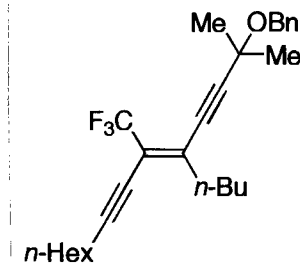

auto

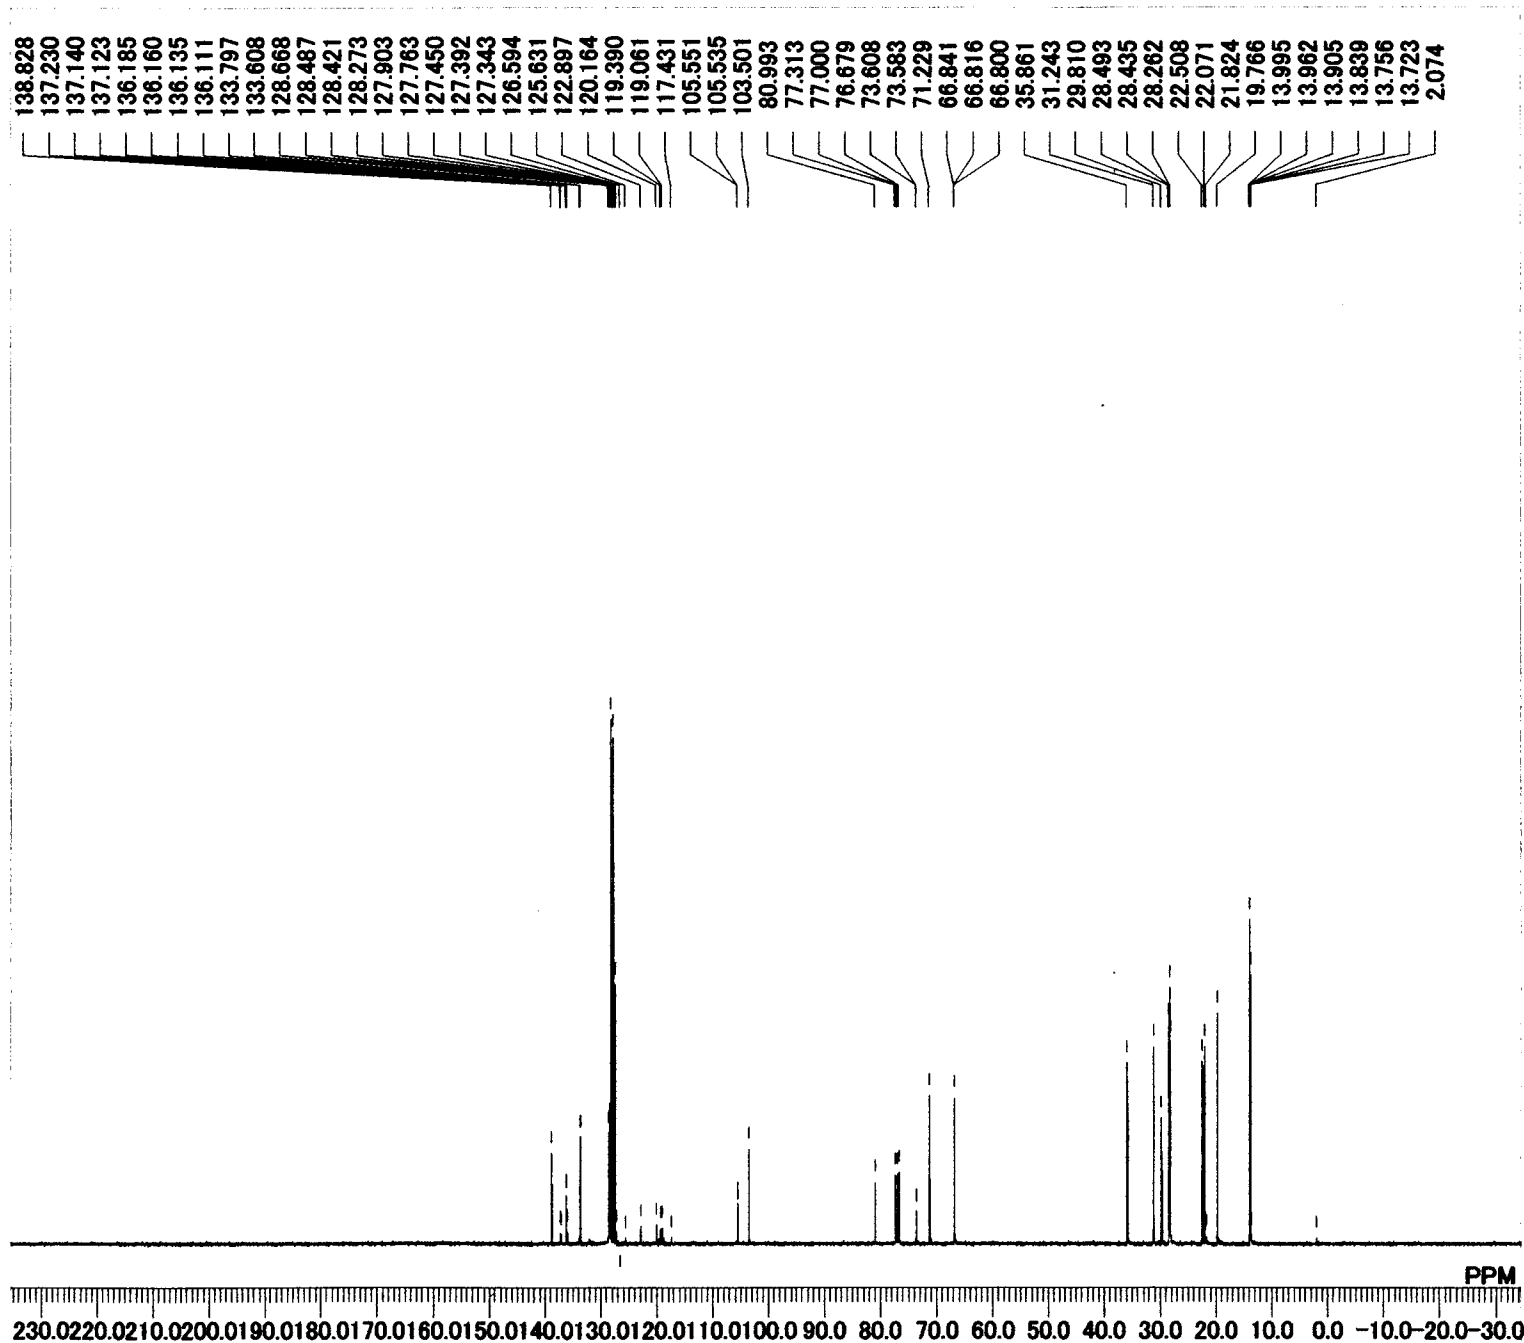

|       |                                      |
|-------|--------------------------------------|
| MENUF | 13C                                  |
| OBNUC | 13C                                  |
| OFR   | 100.40 MHz                           |
| OBSET | 125.00 KHz                           |
| OBFIN | 10500.00 Hz                          |
| PW1   | 6.20 usec                            |
| DEADT | 19.00 usec                           |
| PREDL | 0.20000 msec                         |
| IWT   | 1.0000 msec                          |
| POINT | 32768                                |
| SPO   | 32768                                |
| TIMES | 2000                                 |
| DUMMY | 1                                    |
| FREQU | 27118.64 Hz                          |
| FLT   | 13550 Hz                             |
| DELAY | 14.80 usec                           |
| ACQTM | 1.2083 sec                           |
| PD    | 1.7920 sec                           |
| ADBIT | 16                                   |
| RGAIN | 24                                   |
| BF    | 0.00 Hz                              |
| T1    | 0.00                                 |
| T2    | 0.00                                 |
| T3    | 90.00                                |
| T4    | 100.00                               |
| EXMOD | BCM                                  |
| EXPCM | Bilevel.complete.decoupling:Set_IRRF |
| IRNUC | 1H                                   |
| IFR   | 399.65 MHz                           |
| IRSET | 124.00 KHz                           |
| IRFIN | 10500.00 Hz                          |
| IRRPW | 45 usec                              |
| IRATN | 511                                  |
| DFILE | Rxn463 sonogashira C.als             |
| SF    | TH5ATFG2                             |
| LKSET | 61.60 KHz                            |
| LKFIN | 79.0 Hz                              |
| LKLEV | 180                                  |
| LGAIN | 24                                   |
| LKPHS | 240                                  |
| LKSIG | 967                                  |
| CSPED | 13 Hz                                |
| FILDC |                                      |
| FILDF |                                      |

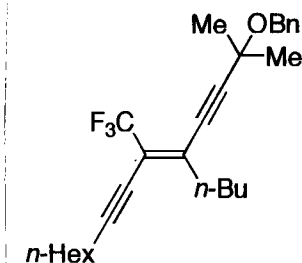

auto

7.504  
7.498  
7.489  
7.480  
7.408  
7.404  
7.387  
7.382  
7.377  
7.369  
7.364  
7.343  
7.309  
7.292  
7.260  
4.661  
2.660  
2.656  
2.641  
2.638  
2.622  
2.619  
1.691  
1.673  
1.653  
1.628  
1.606  
1.484  
1.466  
1.446  
1.428  
1.409  
1.392  
0.991  
0.973  
0.954

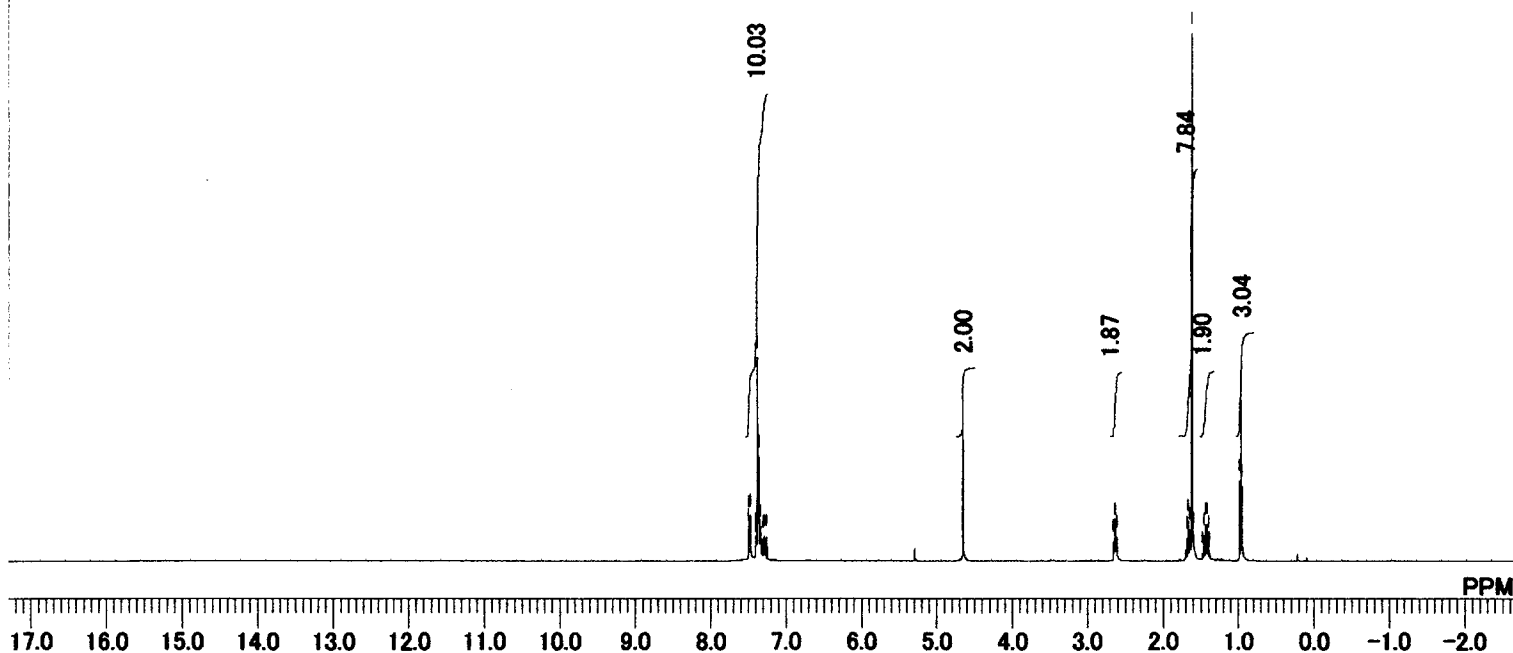

MENUF 1H  
OBNUC 1H  
OFR 399.65 MHz  
OBSET 135.40 KHz  
OBFIN 24.90 Hz  
PW1 5.50 usec  
DEADT 72.20 usec  
PREDL 0.20000 msec  
IWT 1.0000 msec  
POINT 16384  
SPO 16384  
TIMES 8  
DUMMY 1  
FREQU 7992.01 Hz  
FLT 4000 Hz  
DELAY 50.00 usec  
ACQTM 2.0501 sec  
PD 4.9500 sec  
ADBIT 16  
RGAIN 13  
BF 0.10 Hz  
T1 0.00  
T2 0.00  
T3 90.00  
T4 100.00  
EXMOD NON  
EXPCM NON:Single.coupled:PW1\_ACQTM\_PI  
IRNUC 1H  
IFR 399.65 MHz  
IRSET 136.90 KHz  
IRFIN 97.50 Hz  
IRRPW 45 usec  
IRATN 511  
DFILE Rxn471 sonogashira H.als  
SF TH5ATFG2  
LKSET 61.60 KHz  
LKFIN 79.0 Hz  
LKLEV 180  
LGAIN 23  
LKPHS 240  
LKSIG 884  
CSPED 14 Hz  
FILDG  
FILDF

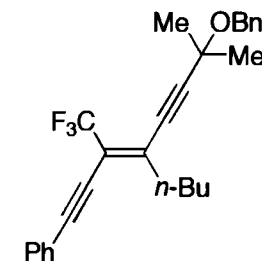

auto

138.762  
137.634  
137.609  
137.584  
137.560  
131.451  
129.088  
128.446  
128.323  
127.788  
127.450  
125.532  
122.799  
122.263  
120.065  
119.481  
119.143  
118.806  
118.476  
117.332  
108.835  
106.819  
106.794  
106.778  
101.426  
82.104  
82.080  
82.055  
82.030  
81.100  
77.321  
77.000  
76.679  
71.278  
66.915  
66.890  
66.866  
65.845  
36.166  
29.901  
28.485  
22.113  
15.255  
13.888

MENUF 13C  
OBNUC 13C  
OFR 100.40 MHz  
OBSET 125.00 KHz  
OBFIN 10500.00 Hz  
PW1 6.20 usec  
DEADT 19.00 usec  
PREDL 0.20000 msec  
IWT 1.0000 msec  
POINT 32768  
SPO 32768  
TIMES 20000  
DUMMY 1  
FREQU 27118.64 Hz  
FLT 13550 Hz  
DELAY 14.80 usec  
ACQTM 1.2083 sec  
PD 1.7920 sec  
ADBIT 16  
RGAIN 25  
BF 0.10 Hz  
T1 0.00  
T2 0.00  
T3 90.00  
T4 100.00  
EXMOD BCM  
EXPCM Bilevel.complete.decoupling:Set\_IRRF  
IRNUC 1H  
IFR 399.65 MHz  
IRSET 124.00 KHz  
IRFIN 10500.00 Hz  
IRRPW 45 usec  
IRATN 511  
DFILE Rxn471 sonogashira C.als  
SF TH5ATFG2  
LKSET 61.60 KHz  
LKFIN 79.0 Hz  
LKLEV 180  
LGAIN 23  
LKPHS 240  
LKSIG 866  
CSPED 11 Hz  
FILDG  
FILDG

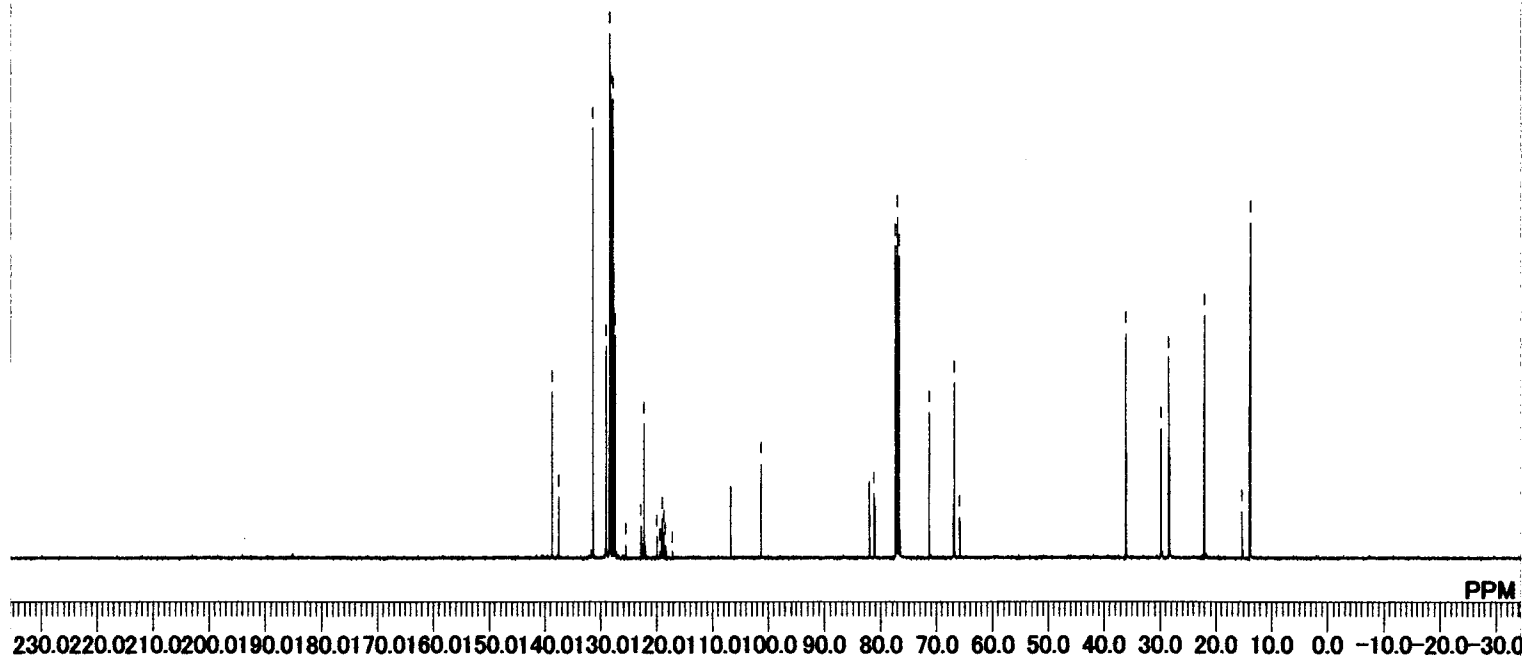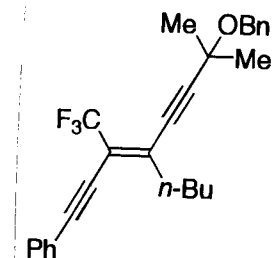

auto

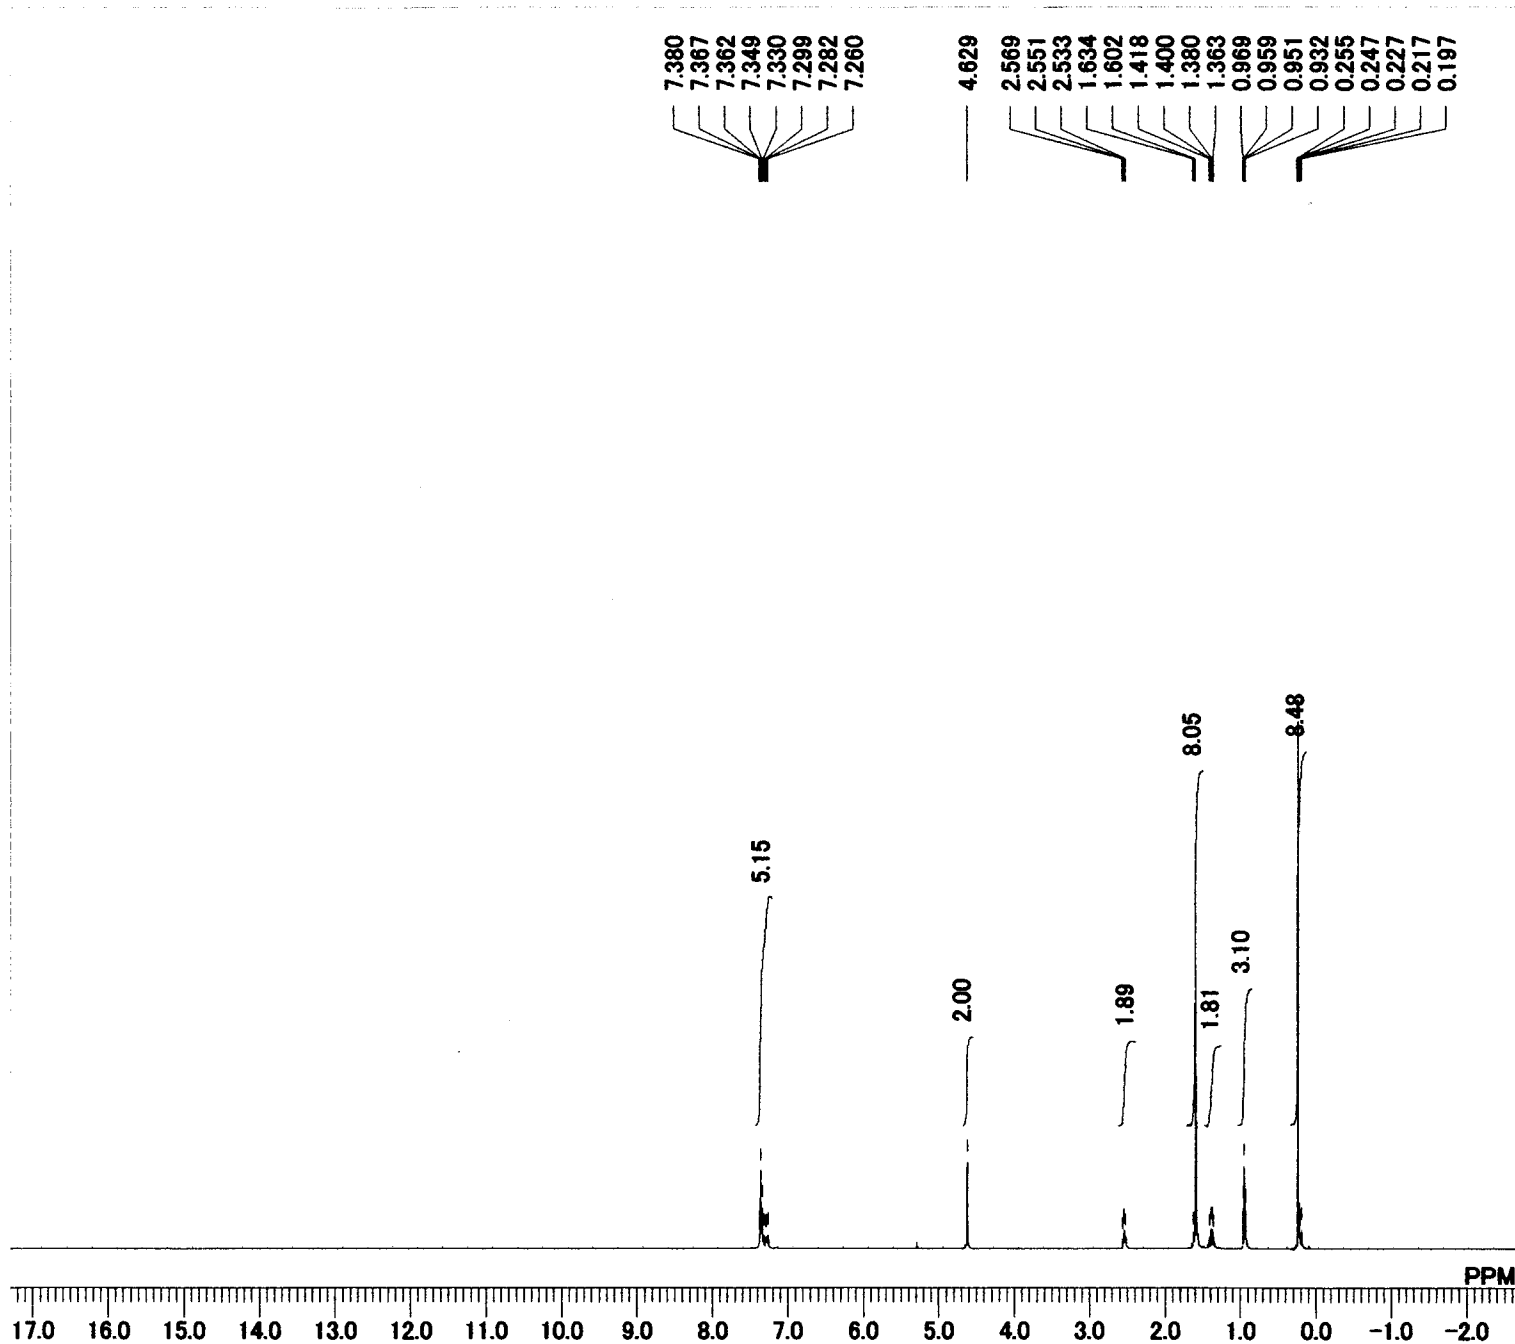

|       |                                 |
|-------|---------------------------------|
| MENUF | 1H                              |
| OBNUC | 1H                              |
| OFR   | 399.65 MHz                      |
| OBSET | 135.40 KHz                      |
| OBFIN | 24.90 Hz                        |
| PW1   | 5.50 usec                       |
| DEADT | 72.20 usec                      |
| PREDL | 0.20000 msec                    |
| IWT   | 1.0000 msec                     |
| POINT | 16384                           |
| SPO   | 16384                           |
| TIMES | 8                               |
| DUMMY | 1                               |
| FREQU | 7992.01 Hz                      |
| FLT   | 4000 Hz                         |
| DELAY | 50.00 usec                      |
| ACQTM | 2.0501 sec                      |
| PD    | 4.9500 sec                      |
| ADBIT | 16                              |
| RGAIN | 11                              |
| BF    | 0.10 Hz                         |
| T1    | 0.00                            |
| T2    | 0.00                            |
| T3    | 90.00                           |
| T4    | 100.00                          |
| EXMOD | NON                             |
| EXPCM | NON:Single.coupled:PW1_ACQTM_PT |
| IRNUC | 1H                              |
| IFR   | 399.65 MHz                      |
| IRSET | 136.90 KHz                      |
| IRFIN | 97.50 Hz                        |
| IRRPW | 45 usec                         |
| IRATN | 511                             |
| DFILE | Rxn472 カラム H.als                |
| SF    | TH5ATFG2                        |
| LKSET | 61.60 KHz                       |
| LKFIN | 79.0 Hz                         |
| LKLEV | 180                             |
| LGAIN | 24                              |
| LKPHS | 240                             |
| LKSIG | 1186                            |
| CSPED | 12 Hz                           |
| FILDG |                                 |
| FILDF |                                 |

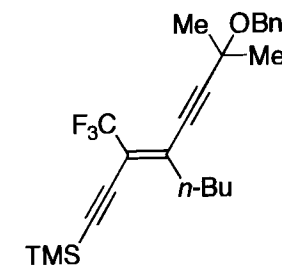



auto

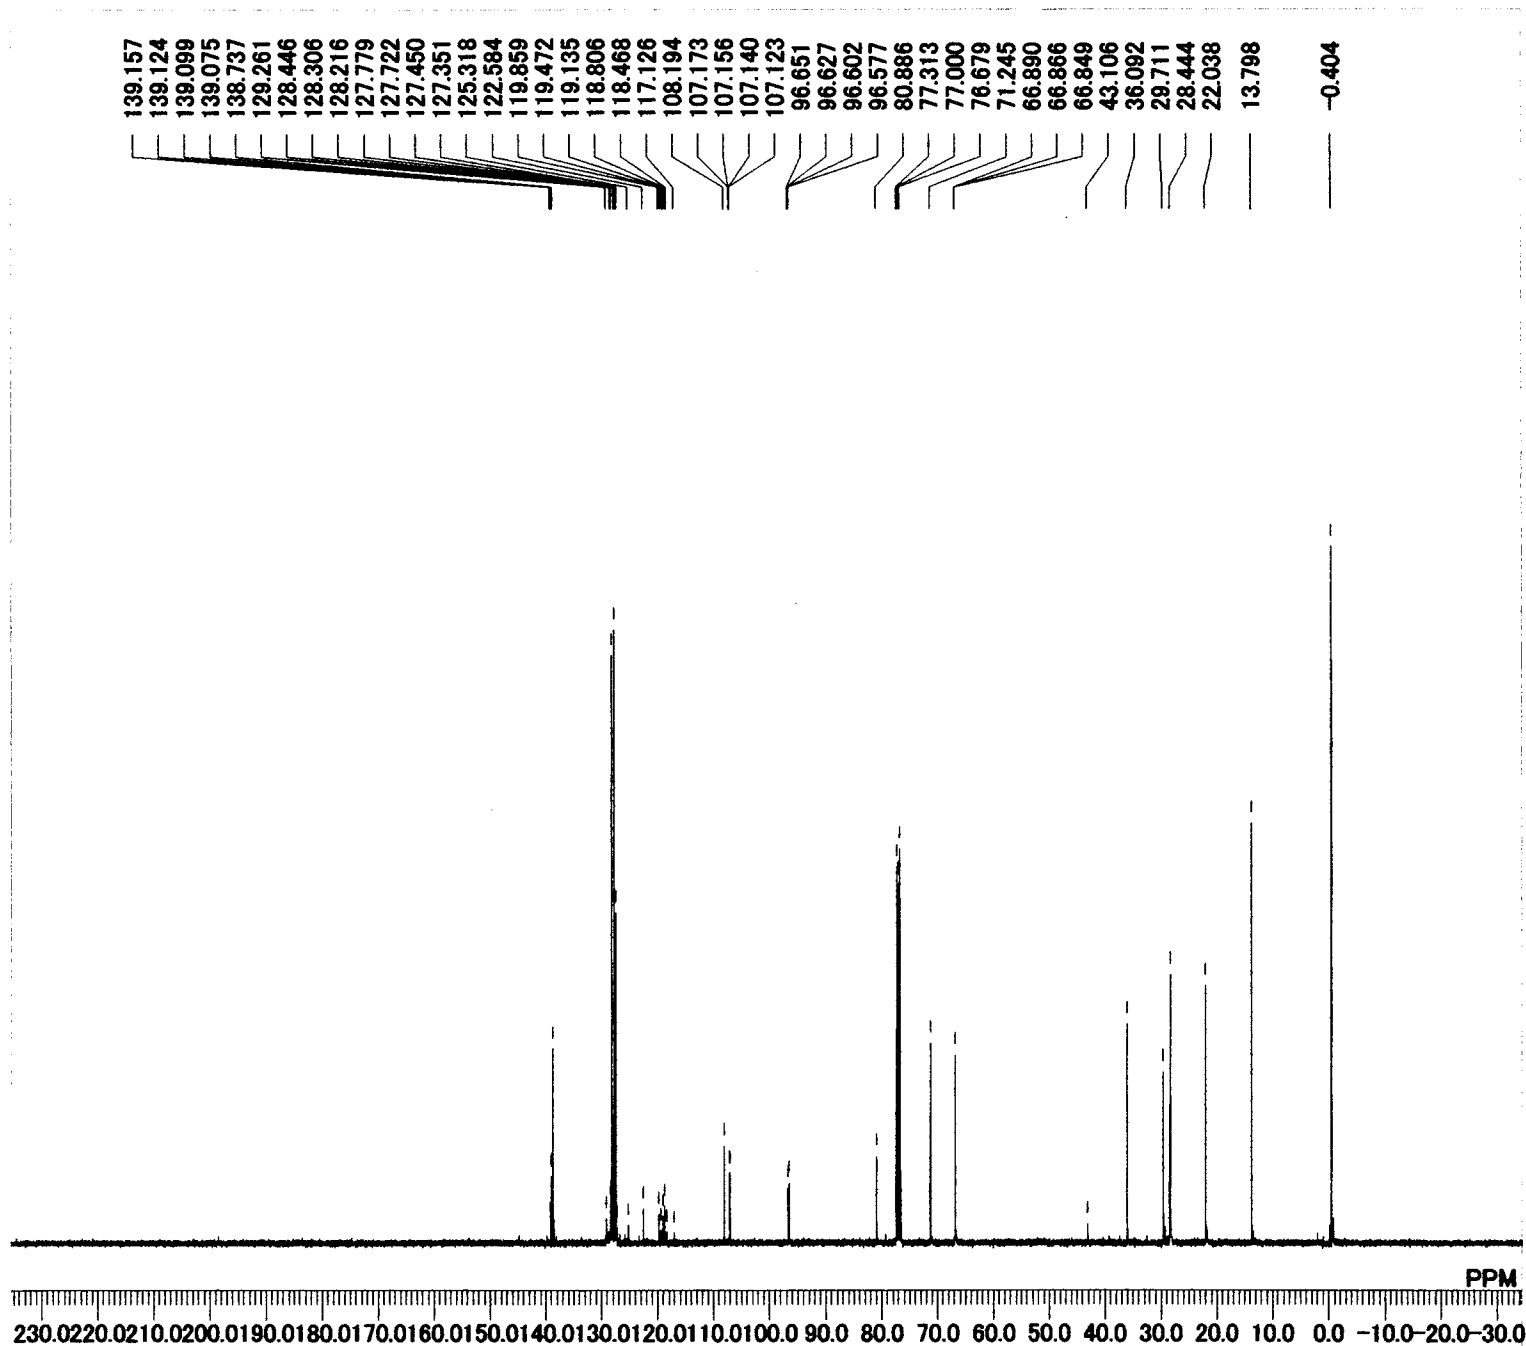

|       |                                      |
|-------|--------------------------------------|
| MENUF | 13C                                  |
| OBNUC | 13C                                  |
| OFR   | 100.40 MHz                           |
| OBSET | 125.00 KHz                           |
| OBFIN | 10500.00 Hz                          |
| PW1   | 6.20 usec                            |
| DEADT | 19.00 usec                           |
| PREDL | 0.20000 msec                         |
| IWT   | 1.0000 msec                          |
| POINT | 32768                                |
| SPO   | 32768                                |
| TIMES | 3000                                 |
| DUMMY | 1                                    |
| FREQU | 27118.64 Hz                          |
| FLT   | 13550 Hz                             |
| DELAY | 14.80 usec                           |
| ACQTM | 1.2083 sec                           |
| PD    | 1.7920 sec                           |
| ADBIT | 16                                   |
| RGAIN | 25                                   |
| BF    | 0.10 Hz                              |
| T1    | 0.00                                 |
| T2    | 0.00                                 |
| T3    | 90.00                                |
| T4    | 100.00                               |
| EXMOD | BCM                                  |
| EXPCM | Bilevel.complete.decoupling.Set_IRRF |
| IRNUC | 1H                                   |
| IFR   | 399.65 MHz                           |
| IRSET | 124.00 KHz                           |
| IRFIN | 10500.00 Hz                          |
| IRRPW | 45 usec                              |
| IRATN | 511                                  |
| DFILE | Rxn472 カラム C.als                     |
| SF    | TH5ATFG2                             |
| LKSET | 61.60 KHz                            |
| LKFIN | 79.0 Hz                              |
| LKLEV | 180                                  |
| LGAIN | 24                                   |
| LKPHS | 240                                  |
| LKSIG | 1147                                 |
| CSPED | 13 Hz                                |
| FILDC |                                      |
| FILDF |                                      |

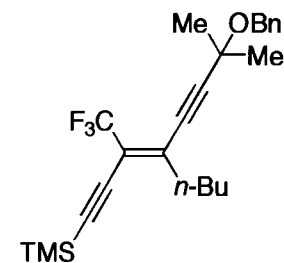

Supplement: Additional file 1 [file 1860-5397-8-249-S1.pdf]
